# Supplementary material for: Widespread variation in heat tolerance and symbiont load are associated with growth tradeoffs in the coral Acropora hyacinthus in Palau
Source: eLife. 2021 Aug 13;10:e64790. doi: 10.7554/eLife.64790 (PMC8457836; doi:10.7554/eLife.64790)
Supplement: Figure 1—figure supplement 1—source data 1. [file elife-64790-fig1-figsupp1-data1.csv]

Counts.Temp.Proportion	Counts.Temp.VB_Score
0.120454151669439	1
0.128100161258676	1
0.0972761515602137	1
0.216261848201627	1
0.194460033743876	1
0.175472656373127	1
0.205328814031539	1
0.178569693257599	1
0.163716545513502	1
0.132780594885009	1
0.119326374068725	1
0.106992499532796	1
0.151282164789145	1
0.136439041656874	1
0.121749932053207	1
0.0542196962922836	3
0.0569112337227964	3
0.0549077279845246	3
0.0380034583639707	4
0.0416713114337029	4
0.0412116354823781	4
0.152316773519836	2
0.149990937658644	2
0.133499772651686	2
0.130063398208915	2
0.134605516491793	2
0.121460540483414	2
0.142893688674453	2
0.137800489405438	2
0.121912614486025	2
0.154019926981211	1
0.17004022996245	1
0.15878924728248	1
0.102129556521509	2
0.0863383433114641	2
0.0897646730051462	2
0.0955468674734496	3
0.0916630335163682	3
0.0770862038680744	3
0.051350864223073	4
0.0465307356473495	4
0.0400927044921953	4
0.0687568069285155	3
0.065712385532583	3
0.060922196428964	3
0.0840325583215701	2
0.0956877836467734	2
0.079482937324317	2
0.0495876117242156	2
0.0548097077623003	2
0.0481717070808248	2
0.0433670970805805	4
0.0471066261665323	4
0.0380374294121309	4
0.0195819691482672	4
0.0169795649103873	4
0.0212151703808927	4
0.0969384122716211	2
0.094261641252947	2
0.084791383058161	2
0.0289681042671382	4
0.0270514142236688	4
0.0262354236629894	4
0.0484072417070753	2
0.0545459932260372	2
0.0442048887062679	2
0.0702309902350309	2
0.0780943944966268	2
0.0681827645646917	2
0.059005727176853	2
0.057360701167571	2
0.0502151443166963	2
0.0352824818880881	4
0.0421826517675548	4
0.0340524804113738	4
0.0729013909266599	2
0.0817428480492971	2
0.0757683201904449	2
0.0878704301808299	2
0.0853944067463632	2
0.07220329913509	2
0.0769917913487516	1
0.0719548821004451	1
0.0600937266314193	1
0.0581234251571302	3
0.058769925541264	3
0.0581564379109573	3
0.0601911141092601	2
0.0734104489373747	2
0.0588060253368355	2
0.0714462823769651	2
0.0765117180803378	2
0.0773354817962312	2
0.15939671409389	2
0.148977792100361	2
0.150250777807676	2
0.0728787543054566	4
0.0732957937839368	4
0.0773749659969597	4
0.107997645754608	3
0.0922693360699646	3
0.100751447941574	3
0.0986838700395182	2
0.097520265271869	2
0.0969038228461003	2
0.0807997941884316	2
0.0846488884716588	2
0.0705167028628946	2
0.0893123371711363	2
0.0999996867362756	2
0.08229511093291	2
0.0596564077395867	3
0.0502510721255006	3
0.0516920813305932	3
0.0560417584396738	3
0.0586549273210294	3
0.0572493341460495	3
0.159105050693685	1
0.14635321015674	1
0.147597763951293	1
0.13486661302926	1
0.123940991889025	1
0.129706008814273	1
0.0608843302560808	3
0.0565847078513266	3
0.0533046578273936	3
0.0937956204333443	3
0.0825044579544306	3
0.082512268612301	3
0.0378534159130743	3
0.0416613039495854	3
0.0386562407977862	3
0.0717079207758639	2
0.0829354932786147	2
0.0582822593887716	2
0.136716052382816	2
0.123654699478466	2
0.124420411869006	2
0.0594850083722161	3
0.0515451551552788	3
0.0472841856149596	3
0.0788710962158875	2
0.0704890958386793	2
0.0702527648467183	2
0.116100095619795	2
0.102280570187432	2
0.088183834057703	2
0.092799022822598	2
0.0860414745240368	2
0.0619921582684317	2
0.100241259745412	2
0.0866335132809604	2
0.0729770595895067	2
0.0475982165320777	3
0.0510773009986546	3
0.0401065943950398	3
0.049276993110426	3
0.0487386237577962	3
0.0416108770749524	3
0.0552620170302499	1
0.0483068984558228	1
0.052973063384936	1
0.0384714274238354	4
0.0324628039900973	4
0.0328145019962589	4
0.0511336993756761	4
0.0423579868542501	4
0.0437619136149684	4
0.0421904881055658	2
0.0339286996288489	2
0.0436314073603224	2
0.101517354890266	2
0.0983929042614531	2
0.0871336559700876	2
0.122914967171631	2
0.121679754278893	2
0.110049367965754	2
0.10538148697352	3
0.0885100851127121	3
0.0682352935303387	3
0.0459713126618322	3
0.0390562140642803	3
0.0332245909287256	3
0.0496432569973421	2
0.0324408071305034	2
0.0234615792044242	2
0.0705734509810709	1
0.0628981394145643	1
0.061812412261385	1
0.0503085376143394	2
0.0398238539005248	2
0.0477803826212777	2
0.07151896200717	2
0.0724384705422317	2
0.0609600387537256	2
0.0583205478319104	3
0.0456344027827741	3
0.0525287878488977	3
0.0147419659217553	3
0.027091370701534	3
0.0181578879362947	3
0.0752896649215941	2
0.0775514683052644	2
0.081095226151175	2
0.119871504383615	3
0.113514233619952	3
0.108038829295619	3
0.102955857031775	2
0.0688531062211775	2
0.0737417041549256	2
0.078891039751167	2
0.0900945937204062	2
0.0989171043114784	2
0.114533645142937	2
0.115122519365529	2
0.0981835627215799	2
0.109484058797817	2
0.133927808082936	2
0.0975038785448056	2
0	5
0	5
0	5
0.0752665552648539	3
0.0716342582120767	3
0.0868848622571232	3
0.0541733797308211	3
0.0598558129025975	3
0.0718511265573927	3
0.0841250567854852	3
0.0942237645762851	3
0.0769356669333503	3
0.0953328536432451	3
0.0741914993821013	3
0.0785531036660976	3
0.0948071230258129	2
0.0890773235239783	2
0.0929765881717603	2
0.0362334650122245	4
0.0820175837765216	4
0.0120776321870425	4
0.0416765101653394	4
0.0587626198916586	4
0.0423836340739452	4
0.0592770650571282	5
0.0404865773913028	5
0.0376203343587195	5
0.11682641544838	2
0.102651944973821	2
0.106554045278338	2
0.0903134850781373	2
0.0969190841590802	2
0.0695825346942644	2
0.241078284617299	2
0.189249698761068	2
0.147563609932525	2
0.0474020968648614	4
0.049814135513077	4
0.0423530330678763	4
0.0391706583344627	4
0.0375941645908689	4
0.0194446062378286	4
0.0270431762827493	5
0.0209887061625374	5
0.0276054349305638	5
0.109137656296818	1
0.110905422671463	1
0.10949342192174	1
0.068591232067056	5
0.0496052695828349	5
0.00963613652345664	5
0	5
0.0242339076433197	5
0.0519311315075779	5
0.140422282320019	1
0.139014096433674	1
0.128030519248215	1
0.080483587860203	2
0.0421259817024369	2
0.0357230875650076	2
0.0435793906678658	5
0.0068584328812943	5
0	5
0.0185284001195393	5
0.0111796588014764	5
1.88509712823093e-07	5
0.0258507645731503	5
0.0237367313989413	5
0.0178967243073082	5
0.116060067593945	1
0.102988901971637	1
0.0950014202878725	1
0.0454870687008482	3
0.0354770556816591	3
0.0365579437325079	3
0.0375013065981133	3
0.0276646919844457	3
0.027079396164077	3
0	5
0	5
0	5
0	4
0.000110888634227492	4
0	4
0.0237459193614909	4
0	4
0	4
0.0848259897500647	2
0.0879225531057671	2
0.069319135830867	2
0.112532989940503	3
0.100337312301202	3
0.0845196614721412	3
0.0681725332316792	4
0.0589587328108585	4
0.03591924464171	4
0.0398898508246586	4
0.030557308581368	4
0.0259320122156956	4
0	5
0	5
0	5
0.116783299623137	1
0.0919776703714886	1
0.0936525097636185	1
0.0140500296615875	3
0.013997162772618	3
0.0131085281115683	3
0.0115814916346605	5
0.0216335072737921	5
0.0127189680676162	5
0.0229473051874824	4
0.020854561729553	4
0.0185153532761796	4
0.0494576677876054	2
0.0421125827112033	2
0.0529811753168902	2
0.0757438003762028	2
0.0636624293806901	2
0.0549636897619936	2
0.013037286257673	4
0	4
0	4
0.0331746383385692	5
0.0335878987223676	5
0.0270465671070213	5
0.129061109528886	2
0.123070997494498	2
0.114308104350158	2
0.135531361252667	2
0.148211846053954	2
0.1354377906872	2
0.109820841614609	3
0.0969436821585702	3
0.0929538059994825	3
0.0938261326914727	3
0.0889120114618201	3
0.0799077913732146	3
0.0335792197110739	4
0.041278401566426	4
0.0218714843612168	4
0.0628139357697678	4
0.0421687143608807	4
0.0496380592811677	4
0.0590551759334555	5
0.0967744647315739	5
0.0853653012309362	5
0.11095077075746	3
0.0980389915218997	3
0.0885411881921749	3
0.0534979106829622	3
0.0823113960102198	3
0.0680785059913747	3
0.0526541811791066	5
0.059426126103869	5
0.044030547718299	5
0.0900117343487443	2
0.0843491707265435	2
0.0824776419762261	2
0.0990316052623666	3
0.0806809647149419	3
0.0940858550937098	3
0.0541529100232655	4
0.0365854936419079	4
0.0403226675141089	4
0.05196373657583	4
0.048515186889523	4
0.0496688823130013	4
0.0444445179523772	4
0.0319769852934396	4
0.0305928905272427	4
0.0613528347617529	4
0.0642255473974911	4
0.0529100400951999	4
0.0284615691530046	4
0.0145839858723012	4
0.0505747161546813	4
0.0912214269422178	5
0.0959995333339336	5
0.0963294936129623	5
0.104088767712542	2
0.101851601167062	2
0.0751224970154302	2
0.0878272539184851	4
0.08949402265684	4
0.0459364531738182	4
0.0518740555843832	3
0.0477941422804719	3
0.0442623382834782	3
0.0921683145902182	3
0.0580318995201517	3
0.0754595304132425	3
0.146935948159864	2
0.123983408281049	2
0.114320904432574	2
0.10561331071685	3
0.0832288325451984	3
0.0879962331389454	3
0.0758305147468469	3
0.0492565174328161	3
0.0545584805574354	3
0.0623686641841733	2
0.0566387617010318	2
0.0532823546668764	2
0.124473961866882	3
0.0978739236161002	3
0.0947458294822133	3
0.0564560873101939	3
0.0464085554489427	3
0.0396384304876097	3
0.0159670335497604	5
0.0227275030784017	5
0.00888367911649369	5
0.0272599031675279	3
0.0403338700088515	3
0.0270423519690259	3
0.0402359241635145	4
0.0366916230452673	4
0.0304548572753026	4
0.040857854646466	4
0.0386942000923047	4
0.0316921578924278	4
0.0250571018625261	4
0.0182757173150867	4
0.0188458258695253	4
0.0291973909888206	4
0.016035201485432	4
0.00904541459542524	4
0.065524392257029	2
0.0826613786701107	2
0.0498155737094848	2
0.124780652241964	3
0.112623759766079	3
0.0933529040377292	3
0.0505049117019063	3
0.0621557174756576	3
0.0419708406732813	3
0.0339063539841454	5
0.0467289717601867	5
0.0919532994527014	5
0.0215686940271469	4
0.0371448698427174	4
0.0254017588537805	4
0.1033706068625	3
0.153318026664567	3
0.0911525498024036	3
0.214184723995731	3
0.221140506319963	3
0.195690479120891	3
0.044854892204714	4
0.0665498550121287	4
0.0657276278392653	4
0.0305290197308363	4
0.038300140217269	4
0.0349022317232066	4
0.0717771055703949	4
0.0674113595559399	4
0.0505442140895078	4
0.054166650064706	2
0.0579693571483008	2
0.065853597464008	2
0.092656031955573	3
0.0778780526352912	3
0.0954772654028431	3
0.0375089870215705	4
0.0380956972667004	4
0.0386906172546774	4
0.0334804221494147	5
0.0571428024293854	5
0.0598085696765441	5
0.0284090686368084	5
0.0854700970138875	5
0.0634919263089702	5
0.0635450934790209	4
0.0669290255325509	4
0.0443160124954546	4
0.0531904882700571	4
0.0270833070926724	4
0.0362812151090783	4
0.13352471700249	2
0.14216561395525	2
0.130319012340762	2
0.136537728447212	3
0.145571340398693	3
0.128555235547046	3
0.0809339977649707	4
0.0937497990770749	4
0.0763524306212501	4
0.0646615812983927	2
0.0576922936514205	2
0.0325991828050464	2
0.0571428133736391	4
0.0373444068316263	4
0.0347826648428026	4
0.0382022583669882	3
0.014416080961401	3
0.0100200791097808	3
0.0589776538226958	3
0.0285326475192562	3
0.0326577031369089	3
0.0218487617639917	4
0.027027253499699	4
0.0306946892021819	4
0.0145279665325743	4
0.00474688707494706	4
0.00629925310171263	4
0.0374285030024442	4
0.0303777568915488	4
0.0165231719076301	4
0.0510095495759727	5
0.0379888847178647	5
0.0207065376867213	5
0.0250810011673438	5
0.0361248494899331	5
0.0233333319449072	5
0.0359343636552162	2
0.0314332226046234	2
0.0258137810747532	2
0.11651693637046	3
0.081582126959923	3
0.0515916358917788	3
0.0650602318387578	4
0.0400000539009692	4
0.0356473223391305	4
0.046999107639139	4
0.0490284697338295	4
0.0303804783213755	4
0.196430535027096	5
0.145454420060764	5
0.11111098638185	5
0.0257071592917286	5
0.103363067974714	5
0.0705253681244747	5
0.0899735045047194	3
0.096670658200561	3
0.0791269861093758	3
0.052062545390519	5
0.0477263293755878	5
0.0520781731485113	5
0.0238670231343236	5
0.0264320497313026	5
0.0226061494628493	5
0.0314502603060761	5
0.0338857508086517	5
0.0305902984100827	5
0.0321809124284888	3
0.036816551745314	3
0.0212457532056462	3
0.0206035121132657	3
0.0331243016257238	3
0.0559732552899426	3
0.0248927877130969	5
0.0347586985605498	5
0.0283089298934216	5
0	5
0.0581433492370238	5
0.0267389559884172	5
0	5
0.0260446027464028	5
0.0275432220079947	5
0.0794047321104394	5
0.0601901563348701	5
0.0544341705916673	5
0.0886872720903349	5
0.0852046496288942	5
0.0863533285776555	5
0.0475451593204591	2
0.0527890709025188	2
0.0511982043768652	2
0.0401284858535065	3
0.02696535459915	3
0.0440115335494576	3
0.129184774365537	2
0.11292690893435	2
0.0948551935622758	2
0.0287355266165131	4
0.0280897343100837	4
0.0134227139876006	4
0.112974087734577	1
0.117015108849081	1
0.100910937194185	1
0.178953445623708	1
0.179390176207257	1
0.171350729766627	1
0.0773891895000737	4
0.0806214892432959	4
0.0801952838248607	4
0.0192196259004016	5
0.0191023854486621	5
0.0201957502246727	5
0.0452488339475128	3
0.0327502527087479	3
0.0438837005527007	3
0.0156989455581082	3
0.0179647466445136	3
0.0201158405432409	3
0.133735681776978	3
0.13238839566113	3
0.137253147230301	3
0.108803273573379	2
0.0824418868897964	2
0.0930131243795895	2
0.155489874457725	3
0.148730867944374	3
0.143693603446851	3
0.176582558558025	2
0.171715535285568	2
0.163589980949743	2
0.113503540165139	3
0.0997696662340752	3
0.0855910110725995	3
0.0264434976137354	4
0.0227018789113139	4
0.0280750104668461	4
0.0451293083392434	3
0.0448564274060317	3
0.0397159063333068	3
0.00919593560446927	4
0.0179856387858668	4
0.0385208279593743	4
0.183205412477223	2
0.179766916421365	2
0.173095948719476	2
0.0740823143982062	2
0.0549638510473089	2
0.0534480240857968	2
0.078772574128029	2
0.184508891181514	2
0.252511774866526	2
0.0705956254560881	2
0.0617309103355418	2
0.0685553803208067	2
0.0782117402602072	3
0.0875812934238726	3
0.0779856088864367	3
0.0575321671741064	3
0.0658905951682359	3
0.0444219884758533	3
0	4
0	4
0	4
0.15613634672306	3
0.141366803092329	3
0.170240433354441	3
0	2
0	2
0	2
0.12148343434677	2
0.142202441932267	2
0.121187983697253	2
0.104069899960269	3
0.118435143602134	3
0.0981065878040022	3
0.140652069004484	2
0.18477623122506	2
0	2
0	2
0	2
0.191732169562643	3
0.170254214061327	3
0.173317630144531	3
0.0477211111942769	3
0.0692841595618045	3
0.0472208152605993	3
0.0928196479626936	2
0.0873439025353328	2
0.0766822014049512	2
0.0184941637722591	3
0.02043824465726	3
0.0145503362572859	3
0.0123291491479972	5
0.011481957325551	5
0.0125605016964784	5
0.0203998195820742	5
0.0125785624965463	5
0.014008311542433	5
0.0242677210769088	2
0.0332054146496571	2
0.0259739301641303	2
0.0438673171920174	2
0.0505198550933136	2
0.0417389835003533	2
0.0496745985437924	4
0.0621297329515352	4
0.049077058099531	4
0.0458377269121155	3
0.0428581964852132	3
0.0377538903024512	3
0.0144498379781925	4
0.0130637346036827	4
0.0145882902028884	4
0.0446322072504265	3
0.049680904305734	3
0.0494438069105028	3
0.0318384601995326	4
0.0245433536315565	4
0.0251700036261912	4
0.0278550785840929	5
0.0282884656680314	5
0.0400694455474166	5
0.0976789308716368	3
0.142258177932418	3
0.130482978830013	3
0.191546587572309	3
0.243382683266398	3
0.15197251621638	4
0.266349938055343	4
0.252523546901834	4
0.0164205204046133	5
0.107862925511332	5
0.0543502236994581	5
0.0256682432680913	5
0.0636148712126866	5
0.0926806055954954	5
0.00599165274325222	5
0.0273656742486997	5
0	5
0.0643579826965145	3
0.0659093492404673	3
0.0681159264336201	3
0.0159292336335682	3
0.0478629068031873	3
0.0388934279223457	3
0.0770707286615514	3
0.0785096194263381	3
0.062379254967244	3
0.0448171591080493	2
0.0434158852348057	2
0.045526205790587	2
0.0166778385056222	4
0.0606813714168028	4
0.00553076017274244	4
0	5
0	5
0	5
0.0378611776708454	3
0.0433461270863378	3
0.0285013320902727	3
0.0305612372320235	4
0.0265512890595728	4
0.0202521991523711	4
0.0422557515622646	5
0.035202935454332	5
0.0360381728839305	5
0.0671452230001715	3
0.0968852998222746	3
0.102562253936656	3
0.175839580984075	3
0.165623076497319	3
0.165619606322342	3
0.0786743989093791	4
0.0810026674113618	4
0.0638500598480996	4
0.0130875188800598	5
0.0115208680902996	5
0.00872721099616349	5
0.0463328182127365	5
0.0346252735389671	5
0.0309658854850416	5
0.0321575960507541	3
0.030890188825454	3
0.0284574800608802	3
0.0306821371410184	5
0.0191296189283603	5
0.0141094296100117	5
0.0322366076791082	5
0.030456644043626	5
0.0250171315098226	5
0.0361043672137072	4
0.033994226633427	4
0.0192822856870613	4
0.0588056706129007	3
0.143586782146818	3
0.144858120931411	3
0.107924224695335	2
0.0939590698649575	2
0.0900939368494866	2
0.0208110925559591	4
0.0152623909110221	4
0.0171125001013576	4
0.0275518629568518	5
0.0230592703186798	5
0.0187607093287032	5
0.0484900245000275	3
0.0357629925049115	3
0.0246431286444515	3
0	4
0	4
0.00909209121574531	4
0.0372077804275177	5
0.0397271566679381	5
0.0383893777991243	5
0.0450992560814129	1
0.0350684879632871	1
0.028671973808936	1
0.0536454959418327	2
0.0526317371441948	2
0.0365960349807987	2
0.0461017610611295	3
0.0450730641761549	3
0.0416425217575956	3
0.048263993356447	3
0.0388618230250199	3
0.032500208624615	3
0.0206929508973841	3
0.0164471843974978	3
0.0182722981657892	3
0.0147921193126458	3
0.0120139080603372	3
0.0121097492251192	3
0.0829986174958428	3
0.0817912518715223	3
0.0793837835662659	3
0.0494389552953302	3
0.0435412194025834	3
0.0305581386025908	3
0	2
4.147254500061e-08	2
0	2
0.0968063462133772	3
0.0738346662237335	3
0.0689400361356669	3
0.0668013389212192	3
0.056683291169858	3
0.0471268749647369	3
0.0644513059680292	3
0.0533474534997816	3
0.0501186529858029	3
0.0777590586211052	3
0.0656675038627792	3
0.0642552568934196	3
0.0995000753612615	2
0.0848264654578901	2
0.0793814567570799	2
0.105995150560487	2
0.0781533869183199	2
0.071488931102609	2
0.11509403402881	2
0.122498102055689	2
0.0876338262544097	2
0.0731371502965509	4
0.0594423251558619	4
0.0544130778366664	4
0.130031213424257	1
0.124994079873074	1
0.0850170928872896	1
0.0563972786968854	1
0.0490796791674568	1
0.0634919592778773	1
0.0461637940309782	2
0.0529470195082281	2
0.0625640702903952	2
0.034343422801586	3
0.0490798048916779	3
0.0204779234948547	3
0.0246351070987927	2
0.0282838290037363	2
0.0139773035045399	2
0.0340966830841417	4
0.0380985917026574	4
0.0340088795588468	4
0.0262707427081226	4
0.0361987561984784	4
0.0398229806543191	4
0.0162232954770621	5
0.00843899430794174	5
0.00782638071698444	5
0.0519479517761452	3
0.0578775496677899	3
0.0816326112506383	3
0	3
0.0333871783451251	4
0.0290611169516134	4
0.0243112280708216	4
0.0971307599580126	3
0.0606319805599221	3
0.0597507262135091	3
0.0187468356394086	4
0.011774362058108	4
0.00839664408470536	4
0.0318348308364973	5
0.0395272960558231	5
0.0361275624967673	5
0	4
0	4
0.0225146722045833	4
0.208993698686728	2
0.175609124946422	2
0.128654886397888	2
0.134042450598186	3
0.0995876533587409	3
0.0754408773412946	3
0.105633898038518	2
0.0400005776132818	2
0.00714319984376162	2
0.116469615914447	4
0.00787485325360242	4
0.00526538851325884	4
0.127561990640737	2
0.177119573896993	2
0.152939860728825	2
0.168000054391304	3
0.145832622413911	3
0.0288315810843133	3
0.0222222886678549	3
0.0168674930385253	3
0.0609417929587444	3
0.112819851990401	3
0.0445545199230383	3
0.00761919957379411	4
0.0071432580329078	4
0.00157013733250089	4
0.114999560170953	1
0.125901859005206	1
0.113066023345343	1
0.0926470818617814	1
0.0771914541138864	1
0.0786037201149684	1
0.113167875489635	3
0.117047536987975	3
0.123388262937369	3
0.0655192499301617	4
0.0543716904877901	4
0.0506666108760887	4
0.137120595657679	1
0.135275201747981	1
0.159714137649981	1
0.149555678826278	2
0.120943725650654	2
0.13139657739023	2
0.116564289742867	4
0.0932830674621198	4
0.122529086879226	4
0.0457515905781159	4
0.0261194401949717	4
0.00366316236186065	4
0.021218386526413	4
0.0172825787961107	4
0.0125662450530241	4
0.0882348213370942	5
0.0447757904827284	5
0.0447761194163704	5
0	5
0	5
0	5
0.0494503881986376	2
0.0546700814680246	2
0.0681814033413149	2
0.0689074082812367	2
0.0636203575564091	2
0.0652050238278725	2
0.0422342974581674	3
0.0346740423408581	3
0.0317892859756862	3
0.0231213949102863	4
0.033364222883835	4
0.0195247409100824	4
0.126213926913762	2
0.162250771321575	2
0.127272467986009	2
0.091891801873936	3
0.0675022575290005	3
0.0766606383475804	3
0.0364582998460567	3
0.0220001335035621	3
0.0241412252653679	3
0	4
0.0271444393845117	4
0.0244499221930573	4
0.0438798521808224	4
0.0441988712361348	4
0.0175000019210616	4
0.123044540053702	2
0.0907331094996653	2
0.107290795901436	2
0.0756059233348802	3
0.0832648582990514	3
0.0825874735351754	3
0.0364682936608737	3
0.0503969726155528	3
0.0577199546019483	3
0.0470587026439435	3
0.0579936858041911	3
0.0459182917848473	3
0.0410255919809519	4
0.0409145002228039	2
0.0301768956906329	2
0.140025214469719	2
0.149630785746567	2
0.128322403335915	2
0.100315141274543	2
0.152219454444846	2
0.12398338676249	2
0.0330651616181252	2
0.0339201151997678	2
0.0258955683924085	2
0.0379403393825954	3
0.0534830559768011	3
0.0513396363301738	3
0.0271493304606039	4
0.0394736269444356	4
0.0241379544858015	4
0.124194234243004	3
0.095387578233195	3
0.0919307260082013	3
0.0631806738658931	5
0.0528720623991513	5
0.0465299587074249	5
0.0318552418285469	3
0.0256706758353201	3
0.020202554788654	3
0.0419204921533952	4
0.0540347550474764	4
0.0474153768939818	4
0.0281096354117849	3
0.0412697800447316	3
0.0250000128594468	3
0.0184883658253996	4
0.0174180813746264	4
0.0177462782776191	4
0.022691266768833	4
0.027494971512865	4
0.0171821790724351	4
0.0869565217355245	5
0.159996704158208	5
0.099998970679531	5
0.206115982993944	2
0.211750521164342	2
0.192731362538903	2
0.0996124588657331	4
0.105669744162303	4
0.0897273894685387	4
0.0451404419067777	4
0.0470915405703646	4
0.0363274819808835	4
0.0197977219966132	5
0.0169248123442458	5
0.0157552707766361	5
0.0974838925527043	4
0.0733589496736153	4
0.0890408152724797	4
0.0815215167863426	5
0.0687830571181536	5
0.0725385906548093	5
0.0794116327459116	3
0.0994621437868881	3
0.0704223489296981	3
0.100917369875794	3
0.11607112479576	3
0.0736839752725756	3
0.0288659800221165	4
0.0423452756638057	4
0.0199354009344095	4
0.0963853119975553	4
0.0857142856932641	4
0.0789470762456719	4
0.117318477625797	3
0.0608979954699032	3
0.0724641663904302	3
0.0743037432660479	3
0.0363040866183461	3
0.0349359081543988	3
0	5
0	5
0	5
0.0272995781705078	5
0.0226194860422291	5
0.0272536996856601	5
0.0283286067668257	3
0.0387029608894085	3
0.0247524783800255	3
0.0566666111289719	4
0.0438355381391258	4
0.0538357869068439	4
0.0174672352516983	5
0.0409836086981365	5
0.0314959821395657	5
0	5
0.0568180745023026	5
0	5
0.0678646740493212	4
0.0580286930233407	4
0.0769229971102885	4
0.0475990626358399	5
0.0180180304727237	5
0.0322581221715804	5
0.0434779789326665	5
0.0399999232958246	5
0.0227271307470436	5
0.0549737888691854	3
0.0330032613461534	3
0.041379251976551	3
0	4
0.0545456193935458	4
0	4
0.0151514153657004	5
0.0208276916808805	5
0.0294041910349085	5
0.066361454138628	4
0.0682509641569342	4
0.0743549594215405	4
0.0278809872225705	4
0.0550458479008161	4
0.0209698287737929	4
0.0231787765445864	5
0.0429041944968499	5
0.0459016393442623	5
0.0254734878599492	5
0.0357142787378764	5
0.0178570654028926	5
0.037162105971509	5
0.0284053635362215	5
0.0289854806352184	5
0.0880827031877983	2
0.0612244338661279	2
0.0733332708333793	2
0.031249973895543	4
0.0255737124837429	4
0.0125627983310289	4
0.0484580460776697	5
0.0465116244410408	5
0.0116279104339841	5
0.0360360028235714	5
0.0336538482126962	5
0.0273972634687598	5
0.0563724765952366	3
0.0526315128220782	3
0.0464285586998084	3
0.0449926404138733	3
0.0508350776088966	3
0.0373311523228391	3
0.0266620422990073	3
0.0499889544377571	3
0.0633803558547776	3
0.0714284686567376	2
0.0502392482721516	2
0.0657893169170045	2
0.0409481754372495	4
0.038543845525258	4
0.0475205996408897	4
0.0250952046112878	4
0.0354886191715689	4
0.0270268759124264	4
0.0714284805455412	2
0.0712643060268337	2
0.0683296232593198	2
0.0216184947565311	3
0.0114942376790133	3
0.0060975671556245	3
0.0778522006990562	3
0.0609212261639794	3
0.0632909958479648	3
0.0406638270723709	3
0.0342261276438824	3
0.0301749571203782	3
0.0159235286278052	4
0.0161290049844026	4
0.0123838974985433	4
0.122287190510825	2
0.128548061769249	2
0.123800947870674	2
0.111085905814121	1
0.141870288514057	1
0.134918670228821	1
0.042168680311681	5
0.0654763124683003	5
0.0769229174573992	5
0.116428731207778	5
0.0736838535660912	5
0.0476191643252898	5
0.0834695186686763	2
0.0905729675047722	2
0.0990990575454926	2
0.0519124899801267	4
0.0499999613460337	4
0.0602738877491624	4
0.0477707518911075	5
0.034843179646211	5
0.0372881205802807	5
0.0162600812477324	5
0.0201345546011477	5
0.0571428571603748	5
0.100337254367148	2
0.0975756435765551	2
0.0782157042233124	2
0.0353982527734485	4
0.0183932393496612	4
0.0265326488956079	4
0.0348432413376788	3
0.0393964918716425	3
0.0330969765207179	3
0.0322222302939536	4
0.0257879900593593	4
0.013381956128002	4
0.154655315277686	4
0.127383776613354	4
0.159863855045199	4
0.0576261587055645	4
0.0613416182053641	4
0.0511742402775799	4
0.106779252117373	4
0.110633493121623	4
0.0901563376975479	4
0.0469482581893367	3
0.0512820445690894	3
0.0722222889276522	3
0.054318757427078	3
0.0413649672369556	3
0.0373443552518616	3
0.0326797401596238	5
0.0451806317632899	5
0.0447760360332902	5
1.07600948968826e-05	5
0	5
0.0740741883255349	5
0.135802087926376	5
0.0234433470005729	5
0.0687022696354904	5
0.231526976986907	3
0.190476136804496	3
0.17050679534234	3
0.137931007965217	3
0.0945136074379336	3
0.120967721384597	3
0.126255364473836	3
0.0938462081950656	3
0.0909091151667248	3
0.0577617207545764	4
0.0414937830990275	4
0.0599250681035182	4
0.0121951219541982	4
0.0785714264546642	4
0.0319149210475344	4
0.0796702665623572	3
0.0662020525117031	3
0.0534759290103499	3
0.102484398125643	3
0.0858207971176403	3
0.0584192431477482	3
0.0578946804115137	2
0.0643274853596659	2
0.0476190476039086	2
0.0697674179308561	5
0.0956937493367693	5
0.0773194534960751	5
0.0864197340449738	5
0.0623959823596641	5
0.051509761577616	5
0.166795615755884	2
0.195686507660427	2
0.202557471159522	2
0.129717535936117	2
0.137586972575513	2
0.136593627662081	2
0.0260873369869807	5
0.0461538455455741	5
0.0341805725124934	5
0.037037053177963	5
0.0535714083256954	5
0.0375588418344462	5
0.277992123169958	2
0.20095691077906	2
0.186813137505195	2
0.169213062790582	2
0.126050420140992	2
0.150375760956811	2
0.187022689950532	2
0.18639785279811	2
0.159600780565036	2
0.0441946274419448	5
0.044659736626943	5
0.0504395769802299	5
0.128205053623265	4
0.103734262136072	4
0.0784313461115222	4
0.0710057482388615	4
0.0916291125497269	4
0.0381679120997734	4
0.169811514685595	2
0.0198677222083606	5
0.014598756504407	5
0.0263158004062187	5
0.0656775691615212	5
0.0696556518304541	5
0.0704110399867132	5
3.90691841360351e-07	5
0.0207613106549322	5
0.0300000081702899	5
0.0654199872779955	2
0.0719458701716278	2
0.0520812239526591	2
0.055735734485891	4
0.046710723291974	4
0.0376823158130815	4
0.0283968909607705	5
0.013972211980258	5
0.0126648525991107	5
0.106992223318967	3
0.0894825726188288	3
0.085930773681619	3
0.0343709888765876	3
0.0283035195258327	3
0.0289374629925103	3
0.059322083189962	2
0.0573066521350677	2
0.0522648640555761	2
0.102564008229105	3
0.0882110196024096	3
0.0996117826678424	3
0.0448197182734293	3
0.0534592683705957	3
0.0503249202997848	3
0.14676684691757	2
0.135001960491805	2
0.116912987167241	2
0.027813660613699	5
0.0267581749340543	5
0.0304150303234695	5
0.0249467759908335	5
0.0221355306874652	5
0.014398133096797	5
0.0717702345986929	1
0.0947799457402356	1
0.0709412922576978	1
0.0426287467270666	1
0.0861613899229713	1
0.0817435101083739	1
0.040462414721923	2
0.0499999975486543	2
0.0861421801050399	2
0.0625180287775767	3
0.0757901248162649	3
0.0551064748712305	3
0.0310358789139142	3
0.041230333738407	3
0.0293785586142791	3
0.0808551574330029	4
0.0797099923681785	4
0.0300000211488384	4
0.0379241119625131	2
0.0871551796933681	2
0.0612244508102462	2
0.0704223768283414	2
0.0812717901323369	2
0.0348431915827607	2
0.0562657900947644	3
0.0854268339535451	3
0.0663128678990898	3
0.0383386491113157	2
0.0607286226275691	2
0.0859101271971369	2
0.0813184938892301	2
0.0709532408283508	2
0.0876818620206972	2
0.0218182868002161	4
0.00884967766799552	4
0.00775952434468525	4
0.0512456595542559	5
0	5
0	5
0.0707395407236452	3
0.0923565033238164	3
0.0811682673236749	3
0.0614034214077918	2
0.0335570387377928	2
0.0514705405771963	2
0.114340824867927	2
0.0630629572437026	2
0.107334146482368	2
0.0511882348120232	2
0.0764225308728081	2
0.0710569520670076	2
0.0438872153255851	4
0.0566802371060079	4
0.0436206113380234	4
0.0236137823964069	5
0.0157300131906667	5
0.0165605159693896	5
0.102040727114243	3
0.0673516365664429	3
0.0495751495532645	3
0.198879513167054	3
0.186418221184677	3
0.192655702675585	3
0.115268437960112	2
0.0866372055475362	2
0.0987916314240088	2
0.0264765142784758	5
0.0154787152045389	5
0.0187265447838857	5
0.0605553945199224	3
0.0666664059507604	3
0.0439715624605154	3
0.0909073400990186	3
0.0631576323153169	3
0.0588234968175889	3
0.0630629562606448	4
0.0281690200113803	4
0.0622834857458719	4
0.0164788181719581	3
0.0193152535386552	3
0.0112804641153607	3
0.0617977133082043	5
0.050445000714831	5
0.0659089335803652	5
0.111517275637593	3
0.0614972635280575	3
0.0780723115620626	3
0.0529278770052082	4
0.0243902137813754	4
0.0377018529191041	4
0.0525845739008767	4
0.0398860208513096	4
0.0255719700197623	4
0.0518903492753107	3
0.0366004522431071	3
0.0331125265634976	3
0.04193541202352	5
0.0672645008685906	5
0.0489977375409828	5
0.0613707118907719	3
0.0539214282291013	3
0.0664110576390589	3
0.151247261411514	3
0.154495885627385	3
0.187244321702923	3
0.100609694693157	2
0.0804148623278109	2
0.106995801734841	2
0.101275397404786	3
0.089021605672237	3
0.0913704389004543	3
0.0896723113720208	3
0.0730289444983318	3
0.0811618185474709	3
0.0639999379317203	3
0.0709219741879389	3
0.0849417517076495	3
0.0516128474655058	4
0.0478720728352916	4
0.0607476241937077	4
0.0578399351457061	2
0.0939596296435052	2
0.0814813769344476	2
0.113385721591385	2
0.0968585089118743	2
0.11464425503072	2
0.0956519674143713	3
0.101503644836214	3
0.0669456131335874	3
0.0191846368735586	3
0.0282827959505816	3
0.0398406218677103	3
0.156327440412904	2
0.124324324361527	2
0.126373642462082	2
0.164178948929402	5
0.130840895568384	5
0.256409269493903	5
0.0621003524945304	2
0.0481170722873235	2
0.0589269577920721	2
0.103174593720816	2
0.158730165977982	2
0.16205503269327	2
0.0861371219926159	3
0.0675104608101299	3
0.0923882690792622	3
0.0475408805654688	3
0.0343481205953742	3
0.0289505059389252	3
0	4
0	4
0	4
0.108741211601153	2
0.122445128587408	2
0.140007428644684	2
0	1
0	1
0	1
0.080144795804687	2
0.0936136309166357	2
0.0691096843012645	2
0.0761504389665058	2
0.092458159090714	2
0.0736795494022895	2
0.0316735053883208	3
0.0255935368597383	3
0.0209633830815151	3
0.153742491367395	2
0.200826969926468	2
0.213269885263778	2
0.111205999274387	2
0.114318773225093	2
0.109353440825888	2
0.0898683482835794	3
0.0759850298256524	3
0.0584633575828112	3
0.152121755072202	2
0.193332499147073	2
0.142302779684286	2
0.0266463082159942	3
0.0495660211372313	3
0.00862066228171963	3
0.0714239373811637	3
0.103115515820748	3
0.0451340987817546	3
0.0891778255288661	3
0.100595476034603	3
0.0617089261997639	3
0.0614756760118416	3
0.0969366272283719	3
0.0564297196078823	3
0	2
0	2
0	2
0.103535000993728	3
0.0757622832923145	3
0.0590325275621436	3
0.13477286385595	3
0.087011772414742	3
0.065117507793594	3
0	4
0	4
0	4
0.109829796422679	3
0	3
0.142308044447412	2
0.133485523360674	2
0.0681001653555371	2
0.019100920095994	2
0.0590217297599839	2
0.0405186570604876	2
0.0516843852788741	3
0.0439463319027086	3
0.0278481471967452	3
0.0255905543301384	5
0.0138069143569102	5
1.00153359725658e-06	5
0.19998614990985	2
0.202874861468334	2
0.206676818906497	2
0.140800512457628	2
0.174682523667337	2
0.165223210513875	2
0.0357730124342718	4
0.03429133939902	4
0.0274618732111401	4
0.1861598237077	2
0.179974134350322	2
0.181511130939083	2
0.069760779803128	2
0.0584544929712571	2
0.0659112833137364	2
0.132830841365127	2
0.103999256506234	2
0.101477098235238	2
0	2
0	2
0	2
0.0166096768663008	2
0	2
0	2
0.218689240244675	2
0.189418982119643	2
0.164648409211368	2
0.0813199638209774	2
0.0902445640077231	2
0.0464477077773275	2
0	3
0	3
0	3
0.0470044967536549	2
0.0553424131086055	2
0.0697618217877976	2
0.0536451389032361	2
0.047666391178865	2
0.0464441781553995	2
0.0524332671327427	2
0.0464493600568462	2
0.0207374939730472	2
0.102277252188459	2
0.112077020898146	2
0.0863944564732759	2
0.0619620976869461	3
0.0467033996383731	3
0.0276682234129126	3
1.35024782559804e-05	4
0.0165292612018286	4
0.00661614643324031	4
0.0402516852457279	2
0.0303798613473879	2
0.0389910170013524	2
0.0579150561112162	2
0.0346667377694251	2
0.0434783990899855	2
0.0248672076887456	3
0.0242216370745685	3
0.0400002404575341	3
0.0174402308961976	3
0.0351125159646951	3
0.0157579877831387	3
0.0222933949539323	2
0.00910496656205875	2
0.0117193469227394	2
0.0211556353203833	2
0.0143371930353252	2
0.00767579848150522	2
0.0633422818083676	3
0.0630136939396851	3
0.0485830402540782	3
0.0716253075864401	3
0.050458739800746	3
0.0382918258875676	3
0.0348316192956322	4
0.130466300901188	5
0.0286451770530985	4
0	5
0.0154926572701999	4
0	5
0	5
0.0987651514957514	3
0.0389609807374447	3
0.0851062209090026	3
0.0785710985432341	3
0.0445858493118606	3
0.0624999500814363	3
0.0817279439493667	3
0.0779474655301314	3
0.0788799452600582	3
0.0505349388853924	3
0.0310664389113128	4
0.0534075436581445	3
0.100810714141939	3
0.0629549652008255	3
0.0337942403934422	3
0.0244644540548809	4
0.0521448812031205	3
0.0620516676046982	3
0.0503033248726942	3
0.0296809724471682	3
0.00624976094067294	4
0.0262100313258099	4
0.0195658394991588	4
0.0222224673082843	4
0.0175730077825819	5
0.0188607963360045	5
0.0231644518563543	5
0.033232017197275	5
0.0421517270668419	5
0.0359240388672736	5
0.02605888161749	5
0.0337933664322865	5
0.0321797528623025	5
0.107526651926422	3
0.103174235228091	3
0.10319753906853	3
0.111110830942179	3
0.101922848916972	3
0.080593624429166	3
0.0365445108193733	2
0.0467021870038705	3
0.0302590410722436	4
0.0269095442867743	3
0.0131584719482158	5
0.035805715265314	2
0.0365472601426864	3
0.0425856408540489	4
0.0253636919228913	3
0.0211268971372377	5
0.0250546333617682	2
0.0295812316659034	3
0.0303021212078446	4
0.0154237944614235	3
0.0215814272336667	5
0.0331966914901484	1
0.0239057761369183	1
0.028005557541773	1
0.0953088199069251	1
0.0929429879947625	1
0.0481203510751554	1
0.0967738330521362	2
0.0438801005224838	2
0.0290559606965158	2
0.0343429426582894	2
0.0289604396253422	2
0.0172984272017796	2
0.0155026508960401	4
0.0116222087439555	4
0.0135374993380681	4
0.0602495605109121	1
0.0550813407418538	1
0.0487037925602358	1
0.0337506738618036	2
0.0406177856860576	2
0.0171674279485319	2
0.0258746823154646	2
0.0261514772708794	2
0.0185261285705448	2
0.0318892964043356	3
0.0339291004328134	3
0.0262741967229857	3
0	5
0.0112358867193067	5
0	5
0.0711385504313947	4
0.0673258073540611	4
0.0659025780226623	4
0.128644119774268	2
0.102768409301087	2
0.0931930213575002	2
0.115842499603051	2
0.0947656139826627	2
0.0861323495632321	2
0.0964319370366587	2
0.0629598750058756	2
0.0530206774791383	2
0.0995354146343665	2
0.0703583746105613	2
0.0647271234669357	2
0.0462387630697108	3
0.0362471011499088	3
0.0338815375966126	3
0.0562986416245353	2
0.0421114683946107	2
0.040073296801986	2
0.0407115144138554	3
0.0295379842209374	3
0.0280234971846469	3
0.0527772067925763	3
0.0487811678343851	3
0.0370717036939317	3
0.0247935616561973	5
0.0193673338590095	5
0.0197403105493871	5
0.0759493809727462	3
0.0400574305049166	3
0.0394738784099717	3
0.0568542918269267	4
0.0432564270596443	4
0.0402229563722726	4
0.0252556878617819	5
0.0346922799092018	5
0.02812071937597	5
0.0169497493684918	3
0.0446334649206145	3
0.00564359572698693	3
0.0611708925988357	4
0.0662665786066045	4
0.0647744536124096	4
0.0874221783500121	3
0.042075095353157	3
0.0372151599783643	3
0.0330846110041768	4
0.0163135826965902	4
0.0152217393666766	4
0.0318813533266862	4
0.0367115203739109	4
0.0324433345261471	4
0.0354560293406102	4
0.0452129618139931	4
0.015139808658221	4
0.0741161602277402	3
0.0554187814750284	3
0.0491368907797616	3
0.0482396075311644	3
0.0351674071061299	3
0.0275132613419661	3
0.0210594798264934	5
0.0155597095437149	5
0.0159484840227805	5
0.0242020989254487	3
0.0132787220490047	3
0.0118022745233469	3
0.0854158315590584	3
0.0501700493841097	3
0.0473780768522876	3
0.128397261063334	3
0.0773440914189326	3
0.075063669668532	3
0.0748976714344876	3
0.0459123277519115	3
0.0373287317090506	3
0.0285402895095406	2
0.0199297414659515	2
0.0177666131875835	2
0.12491727908331	2
0.0737732896509409	2
0.0491609991073054	2
0.0559447501091327	1
0.030992059927139	1
0.0252072895774749	1
0.0353981922654605	3
0.0496388557204562	3
0.0309999623433474	3
0.0587760461790191	3
0.0436146466443128	3
0.036784438515213	3
0.0456650916093898	4
0.0382662590162258	4
0.033976995622765	4
0.0404198427451813	4
0.0201135194129895	4
0.0200255528087665	4
0.039860374950023	4
0.0339334952901767	4
0.0241665392166523	4
0.060966342022548	4
0.0353068287023762	4
0.0263015424291393	4
0.0699432286445391	3
0.0481905501827831	3
0.0342872423917972	3
0.0348664005301059	4
0.0297254850980973	4
0.019738377577849	4
0.0467193088150419	4
0.0319817316743535	4
0.0264564377372429	4
0.049552021704769	4
0.0269373299889266	4
0.0234394458631534	4
0.0700981944289479	3
0.061043576147649	3
0.048271768309677	3
0.120122589127699	2
0.0838103416736483	2
0.0624997304600738	2
0.0234942874455817	4
0.0152894398484691	4
0.0106884565357456	4
0.0214953674080138	4
0.0228494265825679	4
0.00302298530072432	4
0.0130866325269966	5
0.0132303129695809	5
0.00645965025868812	5
0.0378376391067555	4
0.0400000000076301	4
0.011111087436988	4
0.081545655555944	2
0.111482787073796	2
0.0848402037239931	2
0.0703521247576098	3
0.0604107300060991	3
0.0534934849415272	3
0.100090304869488	1
0.101744257674998	1
0.0846703498564752	1
0.134315798670608	2
0.138297965891699	2
0.11148295856395	2
0.0800173791592151	2
0.0832972868130075	2
0.0938328678120019	2
0.0590104047541411	4
0.049889626331245	4
0.0417791701421356	4
0.0363635659185492	5
0.0120481909124375	5
0.0213522325331032	5
0.0910659863634135	2
0.0721896559274534	2
0.0626486801955466	2
0.0383935084702623	2
0.0295142679785036	2
0.0313876875875147	2
0.0547562180813065	2
0.0471998039003768	2
0.0292269736358133	2
0.121391129049721	2
0.100542741051424	2
0.0833100901285149	2
0.0619194789962079	3
0.0397523792044205	3
0.0342586124340342	3
0.0868429502977825	3
0.0586216515933832	3
0.0569803799258846	3
0.113863758252978	2
0.0736702268246795	2
0.0769704173251395	2
0.0890157990282737	2
0.0542699620753558	2
0.0605466063758095	2
0.0461773747313314	4
0.0212718681655225	4
0.026744188790669	4
0.0157105751116868	5
0.0124922080722195	5
0.00826709064504694	5
0.00808606014867345	4
0.00539552440941051	4
0.00274693496539408	4
0.117821601366394	2
0.0707299187391158	2
0.0642473994831982	2
0.0330853876040176	3
0.0123154191651973	3
0.0164551492964141	3
0.0360712900430568	3
0.0241015093963426	3
0.0198393874690423	3
0.133671210317646	2
0.123459420905022	2
0.118069057847642	2
0.0186065750485742	2
0.00855228141163298	2
0.00794514082757849	2
0.0157822771535686	4
0.0112430828218147	4
0.00830191910514913	4
0.0263028203326508	3
0.0191506708356499	3
0.0136118336543502	3
0.148532982833276	2
0.110757579620638	2
0.0829355315076334	2
0.0941535247798063	3
0.0610455355219193	3
0.0442987976888167	3
0.0480190634146929	3
0.044157355024528	3
0.0672003457907926	3
0.116332126297666	2
0.106988272767333	2
0.109599288021659	2
0.140127180020997	2
0.139646848429095	2
0.132256428322957	2
0.0830405016027213	3
0.0934795419258625	3
0.0819673167358288	3
0.0608108165655082	4
0.120371529717159	4
0.0882352941102216	4
0.0171194122562536	5
0.0854272721322714	5
0.0419580419505561	5
0.153990336678961	2
0.138496738073114	2
0.140548640145249	2
0.109335469956521	2
0.0934226408028179	2
0.0884024188980794	2
0.124528302374394	2
0.181208035422681	2
0.145877367933522	2
0.0706735536870017	3
0.0686800489713088	3
0.0688749328419199	3
0.149515429310901	3
0.16135661123407	3
0.130661110626368	3
0.0694708095158883	3
0.11042100838757	3
0.0751685312008024	3
0.0530304949176039	3
0.0870445699217186	3
0.0586593425727606	3
0.0547806927738841	3
0.0593658808471233	3
0.0493291972870358	3
0.0298508774657682	5
0.0567010541370439	5
0.101214616819929	5
0.0726331666296818	3
0.077869794624415	1
0.0425197312833496	2
0.0558525892812577	3
0.0559394721037856	1
0.0320066910906217	2
0.0598990005528307	3
0.0555826668243811	1
0.0342581924943139	2
0.0187354024428291	5
0	5
0.00314478767402254	5
0.241271606989157	2
0.235416435088526	2
[truncated: 2,930 more rows]
