# Supplementary material for: Widespread variation in heat tolerance and symbiont load are associated with growth tradeoffs in the coral Acropora hyacinthus in Palau
Source: eLife. 2021 Aug 13;10:e64790. doi: 10.7554/eLife.64790 (PMC8457836; doi:10.7554/eLife.64790)
Supplement: Figure 1—source data 1. [file elife-64790-fig1-data1.csv]

Diff.Colony	Diff.Mean_Control_Proportion	Diff.Mean_Heated_Proportion	Diff.Mean_Percent_Proportion_Reamining_Heated
1	0.155337500467826	0.1462428510876	0.941452325724074
2	0.136989489835715	0.0766146506495081	0.559273932192817
3	0.126846996177377	0.0664068664567303	0.523519424645028
4	0.0891991193125649	0.0376507648517924	0.422097943813317
5	0.0606110454892883	0.0400393476535481	0.660594901974167
6	0.0793134492047809	0.0640150314483279	0.807114456503415
7	0.0696168451061674	0.109243691983825	1.56921348299001
8	0.0881788906134121	0.0672391906603061	0.762531601300039
9	0.140261606422379	0.0608618892883692	0.433916955899475
11	0.0876962427943691	0.0710518444618575	0.81020397451303
12	0.043229514839652	0.0441715902362328	1.02179241196842
14	0.0501382743315483	0.0554793315447612	1.106526546524
18	0.119800011472039	0.0401084129943726	0.334794734170238
19	0.122833899815322	0.0339996128873742	0.2767934009951
20	0.0787305078301837	0.0164033656954765	0.208348277529943
22	0.0899096070667575	0.0288255202562189	0.320605563705957
23	0.0572615333840029	0.0255609492752431	0.446389535254464
24	0.0564868908890976	0.0178077317376052	0.315254237882691
25	0.130936868227894	0.0732325967708762	0.559296993749811
27	0.0884394953537554	0.0468681461596061	0.529945879633696
29	0.101816667566183	0.0686393462529641	0.669272323176418
30	0.0815639159195462	0.0316802148319004	0.388409684291635
32	0.0881264434470661	0.0457039353079471	0.518617721540068
34	0.074000159111787	0.0491220208619954	0.663809665433153
35	0.136112274615242	0.0602645966046811	0.442756516816981
41	0.0814165519103344	0.0302255581527186	0.371245863936937
42	0.143432414229239	0.0494539540236611	0.34478924648526
43	0.114605918251862	0.029277053325804	0.255458476947619
44	0.159967070107048	0.0626807674106182	0.391835440685843
45	0.119760411191563	0.0325673407380487	0.271937449228991
46	0.119445859381418	0.0457359325987458	0.382900946383588
49	0.0517214160982971	0.0138930502985133	0.268613107423614
50	0.0365955369460634	0.0366036740088225	1.00022235123291
55	0.0586198088647626	0.0138149950158612	0.235671103052089
59	0.106537967516818	0.0204263043620956	0.191727933601428
61	0.041952164320077	0.0420738953334937	1.00290166229537
63	0.0399301816742204	0.0606900818763035	1.51990497742929
64	0.100625063960142	0.0853173315788226	0.847873563713879
65	0.0551073001619702	0.0307779494600926	0.558509478229395
69	0.154290820414354	0.0336189025113422	0.217893082822797
70	0.131012896262857	0.085844831422184	0.655239551760992
72	0.0616724437789159	0.0205231093865462	0.332776003819755
73	0.108631977328644	0.0266414161700638	0.245244695210377
74	0.0937544501039849	0.0480830704417584	0.496133696515974
75	0.10819847274344	0.0362671987545236	0.335191411070288
84	0.0630121593340715	0.030341242240893	0.481514084924988
85	0.0545813977395726	0.0386424656271433	0.707978674557223
86	0.0417054515704773	0.0390628628509314	0.936636851537738
87	0.127085177451291	0.0703832765560898	0.553827582158952
94	0.205133627671674	0.0709430216174293	0.345838088189894
96	0.0800087669966056	0.0352542499571932	0.440629836961353
99	0.0824095532777086	0.0362815506224855	0.425072978342205
101	0.0746708532258397	0.0524071102341433	0.70184158838576
102	0.0621401835015944	0.0664284438162365	1.06900945689245
103	0.0708218326123833	0.0149455247278588	0.211029906690745
104	0.0718614882194631	0.0738220048538292	1.0272818818945
110	0.0949479667888811	0.069328809193293	0.730176869900196
111	0.106717724826695	0.0751441961788891	0.704139788408344
112	0.0988506958276657	0.100922719219274	1.0209611411863
114	0.150452926647168	0.0504245268369362	0.335151518555623
115	0.0954316709230843	0.0762219780661106	0.798707361286209
117	0.158905260574717	0.031279849057271	0.196845900155478
118	0.123628607514204	0.101837740865541	0.823739285859387
120	0.0533107399812597	0.0618558412734165	1.1602885515219
121	0.0409471260941825	0.0200620811086894	0.489950895761148
126	0.035039256376486	0.0251900700138163	0.718909948977135
127	0.0535800306909471	0.0323304514149568	0.603404869277526
128	0.0425950968848991	0.0193200853818145	0.453575336006897
129	0.1035576689303	0.0723778153379616	0.698913137825415
130	0.042475134772894	0.0334226978005474	0.786876792251557
139	0.111766939254536	0.079919168871466	0.71505195905436
141	0.054199964420449	0.063595269609091	1.17334522797394
142	0.0778248973699746	0.037166185888435	0.477561643438466
143	0.104666434776503	0.017566295833061	0.167831223740168
144	0.0902873253253482	0.014388511243441	0.159363578349368
145	0.0820494085527785	0.104437273047817	1.27285832877926
146	0.120699374092457	0.0893718852855453	0.740450279527426
148	0.062962781669392	0.0946393699194447	1.50310020317053
149	0.0828714524077777	0.119747694144318	1.44498124100791
150	0.0570114638946001	0.0390227124489174	0.684471328802583
151	0.261167476020514	0.0197844616304923	0.0757539259173997
152	0.204955304155916	0.0848087787163641	0.413791577952271
153	0.0832438155672135	0.0314488033895513	0.377791469255258
154	0.102364389359485	0.106917080107856	1.04447533734005
155	0.158916654257973	0.0933394337957161	0.587348344524017
156	0.0742511301463254	0.0196600806014918	0.264778200180226
157	0.223693210225241	0.149971985744028	0.670436020802858
158	0.0700792618169996	0.0341935604569825	0.487926949719781
159	0.147051534838235	0.167246156371193	1.13733023293618
160	0.18545045090921	0.0384492698109477	0.207329071579185
161	0.125709809338547	0.0642630069411553	0.582286310958631
162	0.189506650457848	0.00842919908819697	0.0444797006745253
163	0.128457455424503	0.0353948426590616	0.275537473026344
164	0.207660595010694	0.0516141665297848	0.248550605025122
166	0.0543372456624854	0.0365321888743531	0.672323163033915
167	0.09304914434912	0.0598133942182358	0.642815091279251
168	0.0486443620416575	0.0417083771224332	0.857414412932695
171	0.0499793746102083	0.0314119517384923	0.628498295216291
176	0.0601148599270335	0.0245718635450497	0.408748578552369
177	0.0843603334577663	0.0616632907965562	0.730951245319899
178	0.0837765861521933	0.0647236016544791	0.772573873288398
179	0.0931499000429549	0.0573258010493617	0.615414520283185
201	0.0516969644360225	0.0210149969405282	0.406503499185823
202	0.0632303510759838	0.0276697724510595	0.437602701554017
205	0.110104893803018	0.0548898877991058	0.49852359784576
206	0.17346123581217	0.0273606119828151	0.157733293290048
207	0.117044870968416	0.0235653034606748	0.201335635348207
208	0.0959115316502692	0.0131890451719317	0.137512611309598
211	0.0688283213339324	0.0561887619413223	0.816361068414162
216	0.106365577795633	0.0300787047785993	0.282786079876248
217	0.0620797868425533	0.010135738570574	0.163269545307561
218	0.152571537458488	0.0468557534902976	0.307106779356184
219	0.122208214094911	0.019103836057065	0.156322029566919
220	0.193403800667823	0.0223429516623016	0.115524884129223
221	0.0833199322906934	0.00745375068525644	0.0894593944129861
222	0.0682463129263579	0.0400359407358013	0.586638882293943
223	0.178166219884589	0.0329149915863738	0.184743166284244
224	0.106919264490167	0.0300935133719895	0.281460160762303
226	0.0480790049769643	0.0366551537553301	0.762394183758427
228	0.0496720837563609	0.0322211116547506	0.692362567944729
230	0.101281893214041	0.0256737772455602	0.253488322846645
232	0.0783617942868233	0.0400071346325105	0.510543881704324
234	0.0874555259627871	0.0577028592564399	0.567987117970162
235	0.0918566880267781	0.0481490825060239	0.52417612196063
236	0.0859895559157111	0.0490423492661227	0.570329137578
238	0.0923847293595691	0.0654560088497148	0.70851545816576
239	0.164236927564695	0.0251992336068311	0.153432202979472
240	0.137701327376752	0.196601986493348	1.42774213029511
241	0.0589749808538594	0.0325878133770803	0.552570139154997
242	0.03025934917633	0.00566324120404878	0.187156741906359
243	0.0649601119104213	0.0210306393526081	0.323746969241816
245	0.0854664271340786	0.0236216587135784	0.276385236936616
246	0.0472713163274055	0.034123291705426	0.721860408309447
250	0.0746172984967994	0.0194278789692137	0.260366957268589
251	0.0814583411850732	0.0103632236566374	0.127221147716379
252	0.0648732318506555	0.090621942272765	1.39690808809072
253	0.116249286987891	0.0769964997859044	0.66233954444748
254	0.0559436466471383	0.0194343472183682	0.347391498107896
255	0.103564821159205	0.0251335071417736	0.242683827002773
256	0.0199895941264468	0.0283681547505117	1.41914611027444
257	0.0815113537634681	0.0561842850390084	0.689281706718373
258	0.0576970874737385	0.0255391028796616	0.442641110632942
259	0.12893604484141	0.0157288492545901	0.121989543528626
260	0.0411273420615441	0.0275347927802406	0.669500906210686
261	0.0718962621114376	0.0169533692802793	0.235803208433867
263	0.0728929503550474	0.022952027754032	0.314873079526033
264	0.10925153673986	0.0488369856845435	0.447014176110216
265	0.0959429912995947	0.0990438942928682	1.03232026593366
267	0.144482935524134	0.0581318231411178	0.402343868016217
268	0.0580478188173716	0.0195484974329557	0.336765408782345
269	0.0808796348897586	0.0374753874380834	0.463347633667776
270	0.0565563658628955	0.0157524958658733	0.278527370447753
272	0.134967939645656	0.018431881402317	0.121781480974704
274	0.148143796219418	0.028444393747849	0.192005298053249
275	0.09069448249382	0.0537138017716924	0.592249939519226
276	0.0313693289459596	0.0214434248687229	0.683579330168771
277	0.0699688874925553	0.0359640769014208	0.514000982297272
278	0.0395470008344885	0.0105251330154369	0.266142382313302
279	0.123923910017864	0.0697405412238696	0.562769050894347
280	0.03015042477913	0.03039023721104	1.00795386578023
281	0.103694441220539	0.0597901716777464	0.576599584066263
282	0.0899926648167452	0.0565015343199625	0.627845996504474
284	0.144199890580628	0.100569359412932	0.697430206139437
286	0.134511333569404	0.0596538622849934	0.443485769578024
287	0.158763676967061	0.101865807166878	0.641619097723544
289	0.118911614231716	0.0491236043644707	0.413110230500668
290	0.124084021965786	0.0466287731807164	0.375783863562816
293	0.150245137433556	0.111209069608778	0.740184151769697
294	0.133018927954218	0.0496906768421848	0.373560948102718
295	0.134808257192978	0.0483947554204147	0.35898954877176
296	0.111679876598754	0.068201164232936	0.610684451935514
297	0.0870192612825225	0.119987826882623	1.37886515139519
298	0.134800106081777	0.0761740917430455	0.56508925665707
299	0.212635381771336	0.146286772535161	0.687970042034091
300	0.0957319526602338	0.0714981389131781	0.746857626177699
301	0.0652177516491031	0.048292342706135	0.740478496805082
302	0.107154894995037	0.0956009724809004	0.892175504304568
304	0.101590556857997	0.0460134263902597	0.452930152303202
306	0.0967528686327657	0.116311388587769	1.20214925129754
307	0.177393579249608	0.109224129841922	0.615716365293215
308	0.112989441362923	0.150898455620729	1.33550935202912
318	0.169122313722603	0.0469093615466031	0.277369440578636
322	0.0800228025371965	0.0439555749246355	0.549288122022519
324	0.0551133382214358	0.0318104178946377	0.577181838756146
325	0.066874097268915	0.028865562442769	0.431640405203444
326	0.107101705745976	0	0
327	0.0284302072066977	0.0191947329598121	0.675152763406173
332	0.0591494398779811	0.0307197209626982	0.519357766127113
333	0.0380195656624627	0.0204946960286266	0.539056553422473
334	0.0684019037438651	0.0169804088927794	0.248244682726427
335	0.0434312902729639	0.0241120386837602	0.55517666024235
336	0.191824570012505	0.0265173473590663	0.0921583276405018
338	0.142662170108136	0.0475823603074614	0.333531729339282
339	0.120563958291423	0.0582107978324973	0.482820891561905
340	0.102124176368699	0.0622254730338245	0.609311871551079
344	0.162031744270833	0.0842831270090637	0.520164288722252
351	0.198818797612595	0.10434000635224	0.524799503895751
352	0.112001673775754	0.092782054874228	0.82839882428894
353	0.0499880376259613	0.051382552950863	1.02789698078041
356	0.053007905281424	0.056799155319092	1.07152235157265
359	0.040922384046628	0.0492179004683684	1.20271341992901
360	0.0427459131938403	0.00845926995329881	0.197896578204763
371	0.0664913637777452	0.0272590653163224	0.40996399784247
372	0.0586827328503995	0.0828392559433579	1.41164618482477
373	0.0882704221338057	0.158583479448652	1.79656419007786
374	0.147760631239588	0.125899582902004	0.852050927542823
375	0.182856383309005	0.0973738948241218	0.532515699271881
379	0.213778542530971	0.087015798977632	0.407037104601018
381	0.106153891650667	0.0642493076723576	0.605246841856632
382	0.136663915691164	0.141020241936897	1.03187619953447
383	0.101029487117139	0.117605163165788	1.16406770460421
384	0.216967480476429	0.1186392921068	0.546806792641392
385	0.0197939929577196	0.0111953140558928	0.565591494339029
388	0.075212510039959	0.0555235658732141	0.738222482452925
391	0.140352813651981	0.0417123335951705	0.297196276368213
392	0.0266222647842022	0.0157833321688636	0.592862113603105
394	0.0595203439610276	0.0528779847714845	0.888401868210097
395	0.0260190093077205	0.0240139010996888	0.922936796542952
397	0.0680670643559528	0.0503381734977913	0.739537895075815
398	0.103670425646838	0.0777174605113081	0.749658931430061
400	0.122214889765043	0.0618068542901692	0.505722783934037
