# Supplementary material for: Widespread variation in heat tolerance and symbiont load are associated with growth tradeoffs in the coral Acropora hyacinthus in Palau
Source: eLife. 2021 Aug 13;10:e64790. doi: 10.7554/eLife.64790 (PMC8457836; doi:10.7554/eLife.64790)
Supplement: Figure 2—figure supplement 1—source data 1. [file elife-64790-fig2-figsupp1-data1.xlsx]

## Sheet: Overall_values_Palau
Variables	PalauNorth	PalauSouth	Aimeliik			PalauNorth	PalauSouth	Aimeliik	Outside
Major 1, Lat	7.95278	7.43	7.505		%Days Bleached Inside	3.37591	3.55839	3.33387
Major 1, Long	134.544	134.43	134.444		%Days>29.5 Inside	27.8741	37.7585	36.2538	32.1016
Major 2, Lat	7.84222	7.19	7.448		%Days>30 Inside	9.79319	17.0164	15.4936	11.6028
Major 2, Long	134.641	134.29	134.4		%Days>30.5 Inside	1.96168	4.56204	3.91367	2.12895
Minor 1, Lat	7.93333	7.35	7.49		%Days>31 Inside	0.258516	0.684307	0.467064	0.319343
Minor 1, Long	134.638	134.316	134.41		%days bleach inside using outside MMM	2.84367	4.95742	3.86536	3.43674
Minor 2, Lat	7.87	7.3	7.47		Degree Days Inside	302.754	318.689	293.733	308.454
Minor 2, Long	134.554	134.41	134.436		Max Mean Summer Monthly Inside (Celsius)	29.86	30.0581	30.0042	29.908
Center, Lat	7.89958	7.3175	7.47825		Average Run Length Inside (Days)	5.6625	5.32584	5.30539	5
Center, Long	134.594	134.362	134.423		Average Degree Days/ Run Inside	1.89221	1.79039	1.75888	1.71363
Longitude Shift	0.2	0.4	0.4		Multi Day Runs Inside	125	147	126	130
Bleaching Threshold (Celsius)	0.5	0.5	0.5
Degree Day Threshold	0	0	0
#of Days Inside	6576	6576	6209
#of Days Outside	6576	6576	6209
%Days Bleached Inside	3.37591	3.55839	3.33387
%Days Bleached Outside	3.43674	3.19343	3.17281
%Days>29.5 Inside	27.8741	37.7585	36.2538
%Days>29.5 Outside	32.1016	33.2421	33.2099
%Days>30 Inside	9.79319	17.0164	15.4936
%Days>30 Outside	11.6028	12.7281	13.5287
%Days>30.5 Inside	1.96168	4.56204	3.91367
%Days>30.5 Outside	2.12895	2.84367	2.75407
%Days>31 Inside	0.258516	0.684307	0.467064
%Days>31 Outside	0.319343	0.33455	0.225479
%days bleach inside using outside MMM	2.84367	4.95742	3.86536
Degree Days Inside	302.754	318.689	293.733
Degree Days Outside	308.454	307.368	284.091
Degree Days Inside using outside MMM	261.425	433.603	326.928
Max Mean Summer Monthly Inside (Celsius)	29.86	30.0581	30.0042
Max Mean Summer Monthly Outside (Celsius)	29.908	29.9488	29.9681
Average Run Length Inside (Days)	5.6625	5.32584	5.30539
Average Run Length Outside (Days)	5	5.63253	5.43902
Average Run Length Inside using outside MMM (Days)	5.27922	5.77612	5.39548
Average Degree Days/ Run Inside	1.89221	1.79039	1.75888
Average Degree Days/ Run Outside	1.71363	1.85162	1.73226
Average Degree Days/ Run Inside using outside MMM	1.69757	2.15723	1.84705
Multi Day Runs Inside	125	147	126
Multi Day Runs Outside	130	132	133
Multi Day Runs Inside using outside MMM	116	166	140
Ellipse Area (Functional, sq.km)	148.876	286.269	22.8568
Ellipse Area (Points, sq.km)	146.62	289.543	20.9457
