# Supplementary material for: Widespread variation in heat tolerance and symbiont load are associated with growth tradeoffs in the coral Acropora hyacinthus in Palau
Source: eLife. 2021 Aug 13;10:e64790. doi: 10.7554/eLife.64790 (PMC8457836; doi:10.7554/eLife.64790)
Supplement: Figure 2—figure supplement 3—source data 1. [file elife-64790-fig2-figsupp3-data1.csv]

Disp.Reef	Disp.Latitude	Disp.Longitude	Disp.Mean_Proportion_Control
7	7.29173	134.51009	0.105150549181057
9	7.28929	134.50316	0.0888897803650217
13	7.26128	134.26921	0.0825788881907904
14	7.25296	134.2627	0.0942285003544917
15	7.24308	134.26837	0.0852348497242106
17	7.22614	134.34085	0.0994129590580318
18	7.21172	134.34029	0.0715960465238531
19	7.20496	134.33553	0.115115868841166
21	7.20507	134.39668	0.0866307112010338
22	7.4275	134.384	0.111766939254536
23	7.43045	134.37503	0.0748884648696323
24	7.43595	134.37686	0.112471089470685
25	7.43815	134.38715	0.0530323856249515
26	7.45573	134.40218	0.08139701138992
27	7.4496	134.40176	0.151117322729711
30	7.82055	134.57344	0.101908307957646
31	7.85548	134.53091	0.0592592526250149
32	7.85281	134.53098	0.0957721342922546
33	7.80896	134.56378	0.10202931530136
34	7.80922	134.56494	0.0903126236912693
35	7.81062	134.57045	0.117576206365557
36	7.86627	134.52444	0.0675084301960441
37	7.79289	134.61717	0.0822223580075304
38	7.79715	134.6176	0.0862438119500125
39	7.78593	134.62273	0.0751350750096571
40	7.88682	134.66107	0.124879663335983
41	7.90962	134.64052	0.132492362621922
42	7.91835	134.64377	0.110183182124572
43	7.91863	134.64732	0.169122313722603
44	7.92791	134.64221	0.162031744270833
50	7.28993	134.24135	0.103368147264478
51	7.29864	134.23808	0.120938579618795
52	7.30488	134.23358	0.0742762108380313
60	7.71672	134.56789	0.0774000458200989
61	7.72908	134.57095	0.10930354632218
62	7.8691	134.50894	0.0760961962938831
65	7.92862	134.49675	0.126306679306919
