# Supplementary material for: Widespread variation in heat tolerance and symbiont load are associated with growth tradeoffs in the coral Acropora hyacinthus in Palau
Source: eLife. 2021 Aug 13;10:e64790. doi: 10.7554/eLife.64790 (PMC8457836; doi:10.7554/eLife.64790)
Supplement: Figure 2—figure supplement 4—source data 1. [file elife-64790-fig2-figsupp4-data1.csv]

Disp.Reef	Disp.Latitude	Disp.Longitude	Disp.Temp31	Disp.Temp32	Disp.Temp33	Disp.Temp34	Disp.Temp35
7	7.29173	134.51009	1815.66666666667	379.666666666667	141.333333333333	28	2
9	7.28929	134.50316	1537.25	347.5	144.25	48.5	3.5
13	7.26128	134.26921	712.5	0	0	0	0
14	7.25296	134.2627	2652.33333333333	2.33333333333333	0	0	0
15	7.24308	134.26837	NA	NA	NA	NA	NA
17	7.22614	134.34085	2445	8.66666666666667	0.666666666666667	0	0
18	7.21172	134.34029	1204	1	0	0	0
19	7.20496	134.33553	1412.66666666667	1.33333333333333	0	0	0
21	7.20507	134.39668	NA	NA	NA	NA	NA
22	7.4275	134.384	2384	11	9	4	0
23	7.43045	134.37503	3042	185	16	0	0
24	7.43595	134.37686	3202	165.5	0	0	0
25	7.43815	134.38715	2938.66666666667	48.3333333333333	0	0	0
26	7.45573	134.40218	3057.66666666667	68.6666666666667	8	5.33333333333333	2.66666666666667
27	7.4496	134.40176	3027	137.5	10.5	6	2.5
30	7.82055	134.57344	0	0	0	0	0
31	7.85548	134.53091	1127.5	37.25	0	0	0
32	7.85281	134.53098	871	29	0	0	0
33	7.80896	134.56378	495.5	17.25	2	0	0
34	7.80922	134.56494	355.333333333333	7.66666666666667	0	0	0
35	7.81062	134.57045	1918	203.5	48.5	9.5	0.5
36	7.86627	134.52444	1932.5	253.5	70	11.5	0
37	7.79289	134.61717	308.25	0	0	0	0
38	7.79715	134.6176	615	35	0	0	0
39	7.78593	134.62273	NA	NA	NA	NA	NA
40	7.88682	134.66107	540	4	0	0	0
41	7.90962	134.64052	558	25.5	0.5	0	0
42	7.91835	134.64377	205	0	0	0	0
43	7.91863	134.64732	685.75	52	3.5	0	0
44	7.92791	134.64221	486.25	3	0	0	0
50	7.28993	134.24135	907.5	6	0	0	0
51	7.29864	134.23808	1221	24	0	0	0
52	7.30488	134.23358	NA	NA	NA	NA	NA
60	7.71672	134.56789	1515	81	0	0	0
61	7.72908	134.57095	1526	131	3.66666666666667	0	0
62	7.8691	134.50894	1321.5	98	5.5	0	0
65	7.92862	134.49675	151.333333333333	0	0	0	0
