# Supplementary material for: Widespread variation in heat tolerance and symbiont load are associated with growth tradeoffs in the coral Acropora hyacinthus in Palau
Source: eLife. 2021 Aug 13;10:e64790. doi: 10.7554/eLife.64790 (PMC8457836; doi:10.7554/eLife.64790)
Supplement: Source data 1. [file elife-64790-supp3.csv]

Colony	Reef	Mean_Control_Proportion	Mean_34_Proportion	Mean_34.5_Proportion	Mean_35_Proportion	Mean_Heated_Proportion	ControlVBSEnd	Retention	Depth	Group	North	Forereef	Proportion_Percent_Remaining_34	Proportion_Percent_Remaining_34.5	Proportion_Percent_Remaining_35	Mean_Heated_VBS_Initial	Mean_Heated_VBS_Day_1	Mean_Heated_VBS_Day_2	Mean_Control_VBS_Initial	Mean_Control_VBS_Day_1	Mean_Control_VBS_Day_2	Mean_34_VBS_Day_1	Mean_34_VBS_Day_2	Mean_34.5_VBS_Day_1	Mean_34.5_VBS_Day_2	Mean_35_VBS_Day_1	Mean_35_VBS_Day_2	Temperature	MaxTemp	TempVariances	Proportion_VBS_Remaining_Control_Day_1	Proportion_VBS_Remaining_Control_Day_2	Proportion_VBS_Remaining_Heated_Day_1	Proportion_VBS_Remaining_Heated_Day_2	Heated.Mean.VBS.2	VBS.Delta	Final.Heated.VBS.Bleaching.Criterion	Top	Bottom	Mean_Percent_VBS_Reamining_Heated	Mean_Percent_Proportion_Reamining_Heated	Percent_VBS_Remaining_35_Day_1	Percent_VBS_Remaining_35_Day_2	Percent_VBS_Remaining_34_Day_1	Percent_VBS_Remaining_34_Day_2	Percent_VBS_Remaining_34.5_Day_1	Percent_VBS_Remaining_34.5_Day_2	Residuals	Growth
1	7	0.1553375	0.182538351	0.119699823	0.136490379	0.146242851	1	0.941452326	0.256612411	1	0	0	1.175108074	0.770579045	0.878669858	1	1	1	1	1	1	1	1	1	1	1	1	1845	35.649	0.432041989	1	1	1	1	1	0	1	1	0	1	0.941452326	1	1	1	1	1	1	0.485068498	1.016972244
2	7	0.13698949	0.134202264	0.055346219	0.040295468	0.076614651	2	0.559273932	0.256612411	1	0	0	0.979653726	0.404017997	0.294150073	1	2.333333333	3	1	2	2	2	2	2	3	3	4	1845	35.649	0.432041989	0.5	0.5	0.428571429	0.333333333	3	-1	1	0	0	0.666666667	0.559273932	0.666666667	0.5	1	1	1	0.666666667	0.06217442	1.361264743
3	7	0.126846996	0.088098702	0.045991435	0.065130463	0.066406866	1.5	0.523519425	-0.043387589	1	0	0	0.694527299	0.362574095	0.513456881	2	2.666666667	3.333333333	1	1	1.5	3	3	3	4	2	3	1845	35.649	0.432041989	1	0.666666667	0.75	0.6	3.333333333	-1.833333333	1	0	0	0.45	0.523519425	0.75	0.5	0.5	0.5	0.5	0.375	0.003912919	0.940270422
4	7	0.089199119	0.050856342	0.042837051	0.019258901	0.037650765	2	0.422097944	0.256612411	1	0	0	0.570143994	0.480240738	0.215909099	1.333333333	3.333333333	3.333333333	1.5	2	2	2	2	4	4	4	4	1845	35.649	0.432041989	0.75	0.75	0.4	0.4	3.333333333	-1.333333333	1	0	0	0.6	0.422097944	0.5	0.5	1	1	0.5	0.5	-0.181052173	NA
5	7	0.060611045	0.055527191	0.037172538	0.027418314	0.040039348	2	0.660594902	-0.243387589	1	0	0	0.916123298	0.613296433	0.452364975	2	3.333333333	3.333333333	1.5	2	2	2	2	4	4	4	4	1845	35.649	0.432041989	0.75	0.75	0.6	0.6	3.333333333	-1.333333333	1	0	0	0.6	0.660594902	0.5	0.5	1	1	0.5	0.5	-0.005994407	NA
6	7	0.079313449	0.069680133	NA	0.05834993	0.064015031	2	0.807114457	0.356612411	1	0	0	0.878541207	NA	0.735687706	1	2.333333333	2.666666667	1	2	2	1	1	3	4	3	3	1845	35.649	0.432041989	0.5	0.5	0.428571429	0.375	2.666666667	-0.666666667	1	1	0	0.75	0.807114457	0.666666667	0.666666667	2	2	0.666666667	0.5	0.182027258	1.084557168
7	7	0.069616845	0.152875095	0.074516505	0.100339477	0.109243692	2	1.569213483	0.256612411	1	0	0	2.195949765	1.070380374	1.44131031	1.333333333	3	3	1	2	2	2	2	4	4	3	3	1845	35.649	0.432041989	0.5	0.5	0.444444444	0.444444444	3	-1	1	1	0	0.666666667	1.569213483	0.666666667	0.666666667	1	1	0.5	0.5	0.922608754	0.944932975
8	7	0.088178891	0.090535712	0.05386652	0.05731534	0.067239191	2	0.762531601	0.256612411	1	0	0	1.026727723	0.610877728	0.649989352	1.333333333	2.333333333	2.666666667	1	2	2	2	2	2	3	3	3	1845	35.649	0.432041989	0.5	0.5	0.571428571	0.5	2.666666667	-0.666666667	1	1	0	0.75	0.762531601	0.666666667	0.666666667	1	1	1	0.666666667	0.157117517	0.952315143
9	7	0.140261606	0.056924565	0.086270782	0.03939032	0.060861889	1	0.433916956	-0.143387589	1	0	0	0.405845668	0.615070542	0.280834658	1.333333333	3	3	1	1	1	3	3	3	3	3	3	1845	35.649	0.432041989	1	1	0.444444444	0.444444444	3	-2	1	0	0	0.333333333	0.433916956	0.333333333	0.333333333	0.333333333	0.333333333	0.333333333	0.333333333	-0.055921471	0.989552012
11	9	0.087696243	0.080277552	0.086617278	0.046260704	0.071051844	2	0.810203975	0.406840286	1	0	0	0.915404689	0.987696562	0.527510672	1.666666667	2.666666667	2.333333333	2	2	2	2	2	3	2	3	3	1547	35.222	0.416195423	1	1	0.625	0.714285714	2.333333333	-0.333333333	1	1	0	0.857142857	0.810203975	0.666666667	0.666666667	1	1	0.666666667	1	0.203718856	1.030408391
12	9	0.043229515	0.05218066	0.034582911	0.0457512	0.04417159	2.5	1.021792412	0.406840286	1	0	0	1.207060959	0.79998379	1.058332487	1.666666667	3	3	1	1.5	2.5	1	1	4	4	4	4	1547	35.222	0.416195423	0.666666667	0.4	0.555555556	0.555555556	3	-0.5	1	1	0	0.833333333	1.021792412	0.625	0.625	2.5	2.5	0.625	0.625	0.316632115	1.033155288
14	9	0.050138274	0.045970925	0.068305824	0.052161246	0.055479332	1.5	1.106526547	0.406840286	1	0	0	0.916882867	1.362348918	1.040347855	1.333333333	1.666666667	2.333333333	1	1.5	1.5	1	2	2	2	2	3	1547	35.222	0.416195423	0.666666667	0.666666667	0.8	0.571428571	2.333333333	-0.833333333	1	1	0	0.642857143	1.106526547	0.75	0.5	1.5	0.75	0.75	0.75	0.416697332	1.046140189
18	9	0.119800011	0.044982991	0.039838699	0.035503549	0.040108413	2	0.334794734	0.406840286	1	0	0	0.37548403	0.332543365	0.296356808	1	2.666666667	4.333333333	1	1	2	3	4	1	4	4	5	1547	35.222	0.416195423	1	0.5	0.375	0.230769231	4.333333333	-2.333333333	0	0	1	0.461538462	0.334794734	0.5	0.4	0.666666667	0.5	2	0.5	-0.200449587	0.996529121
19	9	0.1228339	0.042610879	0.025388346	NA	0.033999613	1	0.276793401	-0.093159714	1	0	0	0.346898368	0.206688434	NA	2	5	5	1	1	1	5	5	5	5	5	5	1547	35.222	0.416195423	1	1	0.4	0.4	5	-4	0	0	1	0.2	0.276793401	0.2	0.2	0.2	0.2	0.2	0.2	-0.251718482	NA
20	9	0.078730508	0.016812608	0.009902749	0.02249474	0.016403366	1.5	0.208348278	-0.093159714	1	0	0	0.21354629	0.125780329	0.285718214	1.333333333	4	5	1	1.5	1.5	4	5	4	5	4	5	1547	35.222	0.416195423	0.666666667	0.666666667	0.333333333	0.266666667	5	-3.5	0	0	1	0.3	0.208348278	0.375	0.3	0.375	0.3	0.375	0.3	-0.418032514	1.042212406
22	21	0.089909607	0.05435017	0.032126391	0	0.02882552	2.5	0.320605564	0.449326586	1	0	0	0.604497917	0.357318774	0	2.333333333	4	4.333333333	2	2	2.5	4	4	4	4	4	5	NA	NA	NA	1	0.8	0.583333333	0.538461538	4.333333333	-1.833333333	0	0	1	0.576923077	0.320605564	0.625	0.5	0.625	0.625	0.625	0.625	-0.280967924	1.050135017
23	21	0.057261533	0.015311322	0.020772407	0.040599119	0.025560949	2	0.446389535	0.049326586	1	0	0	0.26739281	0.362763718	0.709012078	2.333333333	4.666666667	4.5	1.5	1.5	2	5	5	4	4	5	4.5	NA	NA	NA	1	0.75	0.5	0.518518519	4.5	-2.5	0	0	0	0.444444444	0.446389535	0.4	0.444444444	0.4	0.4	0.5	0.5	-0.227632605	1.118226785
24	21	0.056486891	0.004345762	NA	0.031269701	0.017807732	2	0.315254238	0.549326586	1	0	0	0.076933993	NA	0.553574482	2.333333333	3.333333333	4	1.5	2	2	4	4	3	3	3	5	NA	NA	NA	0.75	0.75	0.7	0.583333333	4	-2	0	0	1	0.5	0.315254238	0.666666667	0.4	0.5	0.5	0.666666667	0.666666667	-0.360486896	1.040593003
25	21	0.130936868	0.09990611	0.087548645	0.032243035	0.073232597	2	0.559296994	0.249326586	1	0	0	0.763009772	0.668632497	0.246248712	1.666666667	3	3.333333333	1.5	2	2	2	3	3	3	4	4	NA	NA	NA	0.75	0.75	0.555555556	0.5	3.333333333	-1.333333333	1	0	0	0.6	0.559296994	0.5	0.5	1	0.666666667	0.666666667	0.666666667	0.048766237	1
27	21	0.088439495	0.043687024	0.050049269	NA	0.046868146	2.5	0.52994588	1.049326586	1	0	0	0.493976402	0.565915357	NA	2.666666667	3.666666667	4.333333333	2.5	2.5	2.5	3	4	4	4	4	5	NA	NA	NA	1	1	0.727272727	0.615384615	4.333333333	-1.833333333	0	0	0	0.576923077	0.52994588	0.625	0.5	0.833333333	0.625	0.625	0.625	-0.074889902	NA
29	21	0.101816668	0.070128152	0.059881838	0.074419243	0.068639346	2.5	0.674146462	0.549326586	1	0	0	0.68876888	0.588133937	0.730914152	2	2.333333333	3.333333333	1	2.5	2.5	2	3	3	3	2	4	NA	NA	NA	0.4	0.4	0.857142857	0.6	3.333333333	-0.833333333	1	0	0	0.75	0.669272323	1.25	0.625	1.25	0.833333333	0.833333333	0.833333333	0.094121542	NA
30	21	0.081563916	NA	0.047501024	0.015859405	0.031680215	2.5	0.388409684	0.549326586	1	0	0	NA	0.582377929	0.19444144	2	3.333333333	3.666666667	2	2	2.5	2	3	3	3	5	5	NA	NA	NA	1	0.8	0.6	0.545454545	3.666666667	-1.166666667	0	0	0	0.681818182	0.388409684	0.5	0.5	1.25	0.833333333	0.833333333	0.833333333	-0.231683551	NA
32	17	0.088126443	0.051543823	0.057529542	0.028038441	0.045703935	2.5	0.518617722	NA	2	0	0	0.584884868	0.652806802	0.318161494	1.666666667	3.333333333	4	1.5	2	2.5	2	3	4	5	4	4	2451.666667	33.118	0.323588384	0.75	0.6	0.5	0.416666667	4	-1.5	1	0	0	0.625	0.518617722	0.625	0.625	1.25	0.833333333	0.625	0.5	-0.086912747	NA
34	17	0.074000159	0.038098434	0.050143931	0.059123697	0.049122021	2.5	0.663809665	NA	2	0	0	0.514842594	0.677619238	0.798967165	2	4.333333333	4.666666667	2	2	2.5	4	4	5	5	4	5	2451.666667	33.118	0.323588384	1	0.8	0.461538462	0.428571429	4.666666667	-2.166666667	0	0	0	0.535714286	0.663809665	0.625	0.5	0.625	0.625	0.5	0.5	0.026931857	NA
35	17	0.136112275	0.083678742	0.058263377	0.03885167	0.060264597	2.5	0.442756517	NA	2	0	0	0.614777343	0.428053806	0.285438402	1.666666667	3	4	2	2	2.5	3	4	3	4	3	4	2451.666667	33.118	0.323588384	1	0.8	0.555555556	0.416666667	4	-1.5	1	0	0	0.625	0.442756517	0.833333333	0.625	0.833333333	0.625	0.833333333	0.625	-0.056289605	NA
41	50	0.081416552	0.037035125	0.023415992	NA	0.030225558	2	0.371245864	2.907536225	5	0	1	0.454884465	0.287607263	NA	1	3.666666667	4	1	1.5	2	3	3	4	4	4	5	907.5	32.291	0.333492199	0.666666667	0.5	0.272727273	0.25	4	-2	0	0	0	0.5	0.371245864	0.5	0.4	0.666666667	0.666666667	0.5	0.5	-0.249174384	0.80146585
42	50	0.143432414	0.079401988	0.019505921	NA	0.049453954	1	0.344789246	3.507536225	5	0	1	0.553584683	0.13599381	NA	1.333333333	2.666666667	4.666666667	1	1	1	2	4	3	5	3	5	907.5	32.291	0.333492199	1	1	0.5	0.285714286	4.666666667	-3.666666667	0	0	0	0.214285714	0.344789246	0.333333333	0.2	0.5	0.25	0.333333333	0.2	-0.138012908	0.941184219
43	50	0.114605918	0.040627596	0.017926511	NA	0.029277053	2.5	0.255458477	1.607536225	5	0	1	0.354498235	0.156418719	NA	1	3.666666667	3.666666667	1.5	2.5	2.5	3	3	4	3	4	5	907.5	32.291	0.333492199	0.6	0.6	0.272727273	0.272727273	3.666666667	-1.166666667	0	0	1	0.681818182	0.255458477	0.625	0.5	0.833333333	0.833333333	0.625	0.833333333	-0.291311947	1.070184699
44	50	0.15996707	0.099621406	0.025740129	NA	0.062680767	2.5	0.391835441	3.507536225	5	0	1	0.622761958	0.160908923	NA	1	4	4	1	2	2.5	3	3	4	4	5	5	907.5	32.291	0.333492199	0.5	0.4	0.25	0.25	4	-1.5	0	0	0	0.625	0.391835441	0.5	0.5	0.833333333	0.833333333	0.625	0.625	-0.054275007	1.094305526
45	50	0.119760411	0.043233881	0.021900801	NA	0.032567341	2	0.271937449	4.007536225	5	0	1	0.361003108	0.18287179	NA	1.333333333	3.666666667	4	1	2	2	3	3	4	4	4	5	907.5	32.291	0.333492199	0.5	0.5	0.363636364	0.333333333	4	-2	0	0	1	0.5	0.271937449	0.5	0.4	0.666666667	0.666666667	0.5	0.5	-0.263394748	1.06857397
46	50	0.119445859	0.081259548	0.05594825	0	0.045735933	2	0.382900946	3.107536225	5	0	1	0.680304432	0.468398407	0	2	3.333333333	3.333333333	2	2	2	3	3	3	3	4	4	907.5	32.291	0.333492199	1	1	0.6	0.6	3.333333333	-1.333333333	1	0	0	0.6	0.382900946	0.5	0.5	0.666666667	0.666666667	0.666666667	0.666666667	-0.153129266	1.053476518
49	50	0.051721416	0.012123869	0.015662231	NA	0.01389305	2.5	0.268613107	NA	5	0	1	0.234407143	0.302819072	NA	2.333333333	4	5	2.5	2	2.5	4	5	4	5	4	5	907.5	32.291	0.333492199	1.25	1	0.583333333	0.466666667	5	-2.5	0	0	1	0.5	0.268613107	0.625	0.5	0.625	0.5	0.625	0.5	-0.417702991	NA
50	50	0.036595537	0.05362713	0.042149938	0.014033954	0.036603674	2	1.000222351	NA	5	0	1	1.46540082	1.151778097	0.383488136	2	3.333333333	3.666666667	2	2	2	3	4	3	3	4	4	907.5	32.291	0.333492199	1	1	0.6	0.545454545	3.666666667	-1.666666667	1	1	0	0.545454545	1.000222351	0.5	0.5	0.666666667	0.5	0.666666667	0.666666667	0.280340733	NA
55	13	0.058619809	0.02762999	NA	0	0.013814995	2.5	0.235671103	4.334628257	2	0	0	0.471342206	NA	0	1.333333333	4.666666667	4.666666667	1.5	2.5	2.5	4	4	5	5	5	5	1425	31.574	0.34930812	0.6	0.6	0.285714286	0.285714286	4.666666667	-2.166666667	0	0	1	0.535714286	0.235671103	0.5	0.5	0.625	0.625	0.5	0.5	-0.435336917	1.02685093
59	13	0.106537968	0.017728661	NA	0.023123948	0.020426304	2.5	0.191727934	3.434628257	2	0	0	0.166406978	NA	0.217048889	2.666666667	4.333333333	4.666666667	3	2.5	2.5	4	4	4	5	5	5	1425	31.574	0.34930812	1.2	1.2	0.615384615	0.571428571	4.666666667	-2.166666667	0	0	1	0.535714286	0.191727934	0.5	0.5	0.625	0.625	0.625	0.5	-0.37294591	1.030070426
61	15	0.041952164	0.044272449	0.039875342	NA	0.042073895	1.5	1.002901662	NA	2	0	0	1.055307866	0.950495459	NA	1.666666667	3.666666667	3.666666667	1	1.5	1.5	3	3	4	3	4	5	NA	NA	NA	0.666666667	0.666666667	0.454545455	0.454545455	3.666666667	-2.166666667	0	1	0	0.409090909	1.002901662	0.375	0.3	0.5	0.5	0.375	0.5	0.294906823	NA
63	15	0.039930182	0.056870502	0.055972471	0.069227273	0.060690082	2.5	1.519904977	1.17597174	2	0	0	1.424248508	1.401758481	1.733707943	2	3.333333333	3	2	2.5	2.5	3	3	4	3	3	3	NA	NA	NA	0.8	0.8	0.6	0.666666667	3	-0.5	1	1	0	0.833333333	1.519904977	0.833333333	0.833333333	0.833333333	0.833333333	0.625	0.833333333	0.807423199	0.993507333
64	15	0.100625064	0.08521249	0.108408654	0.062330851	0.085317332	1.5	0.847873564	2.17597174	2	0	0	0.846831656	1.0773524	0.619436636	1.333333333	2.666666667	2.666666667	1	1	1.5	2	2	3	2	3	4	NA	NA	NA	1	0.666666667	0.5	0.5	2.666666667	-1.166666667	1	1	0	0.5625	0.847873564	0.5	0.375	0.75	0.75	0.5	0.75	0.27007852	1.026810791
65	15	0.0551073	0.034633717	0.022298747	0.035401385	0.030777949	1.5	0.558509478	1.67597174	2	0	0	0.628477842	0.404642334	0.642408259	1.333333333	3	3	1.5	1	1.5	3	3	3	2	3	4	NA	NA	NA	1.5	1	0.444444444	0.444444444	3	-1.5	1	0	0	0.5	0.558509478	0.5	0.375	0.5	0.5	0.5	0.75	-0.120293076	1.01295795
69	15	0.15429082	0.022640454	0.072772055	0.005444198	0.033618903	2.4	0.217893083	0.67597174	2	0	0	0.146738829	0.471655117	0.035285303	2	3	3.333333333	2	2	2.5	2	3	3	3	4	4	NA	NA	NA	1	0.8	0.666666667	0.6	3.333333333	-0.833333333	1	0	1	0.75	0.217893083	0.625	0.625	1.25	0.833333333	0.833333333	0.833333333	-0.240813411	1.034378427
70	15	0.131012896	0.082814085	0.117867892	0.056852517	0.085844831	1	0.655239552	0.67597174	2	0	0	0.632106363	0.899666332	0.43394596	1.333333333	2.333333333	2.666666667	1	1	1	1	1	3	3	3	4	NA	NA	NA	1	1	0.571428571	0.5	2.666666667	-1.666666667	1	0	0	0.375	0.655239552	0.333333333	0.25	1	1	0.333333333	0.333333333	0.144877507	1.097761897
72	14	0.061672444	0.036232542	0.025336786	0	0.020523109	2	0.332776004	3.466754862	2	0	0	0.587499695	0.410828316	0	1.666666667	4.333333333	4	1.5	1.5	2	4	3	4	4	5	5	2652.333333	32.291	0.382928994	1	0.75	0.384615385	0.416666667	4	-2	0	0	1	0.5	0.332776004	0.4	0.4	0.5	0.666666667	0.5	0.5	-0.331457978	1.004433774
73	14	0.108631977	0.02753322	0.017198121	0.035192908	0.026641416	2.5	0.245244695	1.966754862	2	0	0	0.253454095	0.158315451	0.323964539	1.333333333	3.666666667	3.666666667	1.5	2	2.5	3	3	4	4	4	4	2652.333333	32.291	0.382928994	0.75	0.6	0.363636364	0.363636364	3.666666667	-1.166666667	1	0	1	0.681818182	0.245244695	0.625	0.625	0.833333333	0.833333333	0.625	0.625	-0.314782375	1.082173921
74	14	0.09375445	0.048195074	0.05032356	0.041025592	0.04808307	2.5	0.51286174	3.266754862	2	0	0	0.514056384	0.536759162	0.437585543	2.333333333	3.666666667	3.333333333	1	1.5	2.5	3	3	4	3	4	4	2652.333333	32.291	0.382928994	0.666666667	0.4	0.636363636	0.7	3.333333333	-0.833333333	1	0	0	0.75	0.496133697	0.625	0.625	0.833333333	0.833333333	0.625	0.833333333	-0.096907781	0.827264138
75	14	0.108198473	0.030960282	0.047587677	0.030253637	0.036267199	2	0.335191411	3.666754862	2	0	0	0.286143427	0.439818382	0.279612425	1.666666667	3.333333333	3	1	2	2	2	2	4	3	4	4	2652.333333	32.291	0.382928994	0.5	0.5	0.5	0.555555556	3	-1	1	0	0	0.666666667	0.335191411	0.5	0.5	1	1	0.5	0.666666667	-0.22579764	1.096619614
84	18	0.063012159	0.023128828	0.035532527	0.032362372	0.030341242	2.5	0.481514085	2.025085714	2	0	0	0.367053414	0.563899529	0.513589311	2	4	4.666666667	2	1.75	2.5	4	4	4	5	4	5	1204	32.086	0.327075437	1.142857143	0.8	0.5	0.428571429	4.666666667	-2.166666667	0	0	0	0.535714286	0.481514085	0.625	0.5	0.625	0.625	0.625	0.5	-0.179746963	1.055742078
85	18	0.054581398	0.04233754	0.029203567	0.04438629	0.038642466	2.5	0.707978675	NA	2	0	0	0.775677098	0.535046147	0.813212779	2	3.333333333	3.666666667	2.5	2	2.5	3	4	4	4	3	3	1204	32.086	0.327075437	1.25	1	0.6	0.545454545	3.666666667	-1.166666667	1	0	0	0.681818182	0.707978675	0.833333333	0.833333333	0.833333333	0.625	0.625	0.625	0.028009101	NA
86	18	0.041705452	0.067354808	0.035021637	0.014812144	0.039062863	2.5	0.936636852	0.825085714	2	0	0	1.615012068	0.839737635	0.355160852	1.5	2.666666667	3.333333333	1.5	1.75	2.5	3	3	1	3	4	4	1204	32.086	0.327075437	0.857142857	0.6	0.5625	0.45	3.333333333	-0.833333333	1	1	0	0.75	0.936636852	0.625	0.625	0.833333333	0.833333333	2.5	0.833333333	0.228094537	0.986281443
87	18	0.127085177	0.061522637	0.079243916	NA	0.070383277	1.5	0.553827582	1.825085714	2	0	0	0.484105527	0.623549638	NA	1.833333333	5	5	2.5	3	1.5	5	5	5	5	5	5	1204	32.086	0.327075437	0.833333333	1.666666667	0.366666667	0.366666667	5	-3.5	0	0	0	0.3	0.553827582	0.3	0.3	0.3	0.3	0.3	0.3	0.034749619	1.098938398
94	19	0.205133628	0.134632712	0.035473918	0.042722434	0.070943022	2	0.345838088	0.894874128	2	0	0	0.656317122	0.172930781	0.208266362	1.666666667	3.333333333	4	1.5	1.5	2	2	2	4	5	4	5	1412.666667	32.086	0.295971991	1	0.75	0.5	0.416666667	4	-2	0	0	0	0.5	0.345838088	0.5	0.4	1	1	0.5	0.4	-4.42E-05	1.04712245
96	19	0.080008767	0.02026076	0.06858142	0.01692057	0.03525425	2.857142857	0.440629837	NA	2	0	0	0.253231745	0.857173819	0.211483947	2.5	4.666666667	5	2.5	3	3	4	5	5	5	5	5	1412.666667	32.086	0.295971991	0.833333333	0.833333333	0.535714286	0.5	5	-2	0	0	0	0.6	0.440629837	0.6	0.6	0.75	0.6	0.6	0.6	-0.182914397	NA
99	19	0.082409553	0.04003598	0.046709591	0.018344652	0.036281551	2.666666667	0.440259038	1.494874128	2	0	0	0.485817216	0.566798257	0.222603462	1.333333333	3.666666667	4	1.75	1.75	2.5	2	3	4	4	5	5	1412.666667	32.086	0.295971991	1	0.7	0.363636364	0.333333333	4	-1.5	0	0	0	0.625	0.425072978	0.5	0.5	1.25	0.833333333	0.625	0.625	-0.193143721	NA
101	23	0.074670853	0.058868197	0.064471543	0.03388159	0.05240711	1	0.701841588	2.5795808	3	0	0	0.788369155	0.863409751	0.453745859	1.333333333	3	2.666666667	1	1.5	1	3	2	3	3	3	3	3101.75	33.43	0.420073784	0.666666667	1	0.444444444	0.5	2.666666667	-1.666666667	1	0	0	0.375	0.701841588	0.333333333	0.333333333	0.333333333	0.5	0.333333333	0.333333333	0.066452103	1.050450516
102	23	0.062140184	0.069335164	0.063521724	NA	0.066428444	2	1.069009457	2.5795808	3	0	0	1.115786277	1.022232637	NA	2	4	4	2	2	2	3	3	4	4	5	5	3101.75	33.43	0.420073784	1	1	0.5	0.5	4	-2	0	1	0	0.5	1.069009457	0.4	0.4	0.666666667	0.666666667	0.5	0.5	0.405813426	1.048030934
103	23	0.070821833	0.012809163	0.017081887	NA	0.014945525	2	0.211029907	3.1795808	3	0	0	0.180864607	0.241195206	NA	3	4.333333333	4.666666667	2	3	2	4	4	4	5	5	5	3101.75	33.43	0.420073784	0.666666667	1	0.692307692	0.642857143	4.666666667	-2.666666667	0	0	1	0.428571429	0.211029907	0.4	0.4	0.5	0.5	0.5	0.4	-0.43290086	1.014983203
104	23	0.071861488	0.066222573	0.081421437	NA	0.073822005	2	1.027281882	2.7795808	3	0	0	0.92153077	1.133032994	NA	1.833333333	3	3	1	2	2	2	2	3	3	4	4	3101.75	33.43	0.420073784	0.5	0.5	0.611111111	0.611111111	3	-1	1	1	0	0.666666667	1.027281882	0.5	0.5	1	1	0.666666667	0.666666667	0.385658194	0.982456054
110	23	0.094947967	0.081287691	0.073287888	0.053410848	0.069328809	2.5	0.73017687	NA	3	0	0	0.856128827	0.771874221	0.562527561	1	2.666666667	3.333333333	2	2.5	2.5	2	3	3	3	3	4	3101.75	33.43	0.420073784	0.8	0.8	0.375	0.3	3.333333333	-0.833333333	1	0	0	0.75	0.73017687	0.833333333	0.625	1.25	0.833333333	0.833333333	0.833333333	0.1397839	NA
111	24	0.106717725	0.108296162	0.088033742	0.029102685	0.075144196	2	0.704139788	NA	3	0	0	1.014790767	0.824921464	0.272707134	1.333333333	1.666666667	2.666666667	2	2	2	1	2	2	3	2	3	3204.5	32.807	0.422575464	1	1	0.8	0.5	2.666666667	-0.666666667	1	0	0	0.75	0.704139788	1	0.666666667	2	1	1	0.666666667	0.13986484	NA
112	24	0.098850696	0.082011951	0.036946502	NA	0.100922719	2	1.020961141	2.0339626	3	0	0	0.829654763	0.373760671	1.85946799	2	3.333333333	3.666666667	2	2	2	3	3	3	3	4	5	3204.5	32.807	0.422575464	1	1	0.6	0.545454545	3.666666667	-1.666666667	0	1	0	0.545454545	1.020961141	0.5	0.4	0.666666667	0.666666667	0.666666667	0.666666667	0.439228635	1.124092519
114	24	0.150452927	0.074772245	0.026076808	NA	0.050424527	2	0.335151519	NA	3	0	0	0.496980995	0.173322042	NA	1.666666667	3.333333333	3.666666667	2	2	2	3	3	3	3	4	5	3204.5	32.807	0.422575464	1	1	0.5	0.454545455	3.666666667	-1.666666667	0	0	0	0.545454545	0.335151519	0.5	0.4	0.666666667	0.666666667	0.666666667	0.666666667	-0.132071564	NA
115	24	0.095431671	0.073224517	0.083827409	0.071614008	0.076221978	2.5	0.798707361	NA	3	0	0	0.767297865	0.878402405	0.750421814	2	3	3	2	2	2.5	3	3	3	3	3	3	3204.5	32.807	0.422575464	1	0.8	0.666666667	0.666666667	3	-0.5	1	1	0	0.833333333	0.798707361	0.833333333	0.833333333	0.833333333	0.833333333	0.833333333	0.833333333	0.209387769	NA
117	24	0.158905261	0.039547102	0.041159621	0.013132823	0.031279849	2	0.1968459	1.5339626	3	0	0	0.248872203	0.25901988	0.082645618	2	3	3.333333333	2	2	2	2	2	3	3	4	5	3204.5	32.807	0.422575464	1	1	0.666666667	0.6	3.333333333	-1.333333333	0	0	1	0.6	0.1968459	0.5	0.4	1	1	0.666666667	0.666666667	-0.251620786	1.132925017
118	24	0.123628608	0.112769065	0.160235416	0.032508742	0.101837741	2	0.823739286	2.1339626	3	0	0	0.912159957	1.296103052	0.262954848	1.666666667	2.333333333	2.666666667	2	2	2	2	2	2	2	3	4	3204.5	32.807	0.422575464	1	1	0.714285714	0.625	2.666666667	-0.666666667	1	1	0	0.75	0.823739286	0.666666667	0.5	1	1	1	1	0.296990921	1.037474047
120	24	0.05331074	0.039873374	0.100249577	0.045444574	0.061855841	2	1.160288552	2.3339626	3	0	0	0.747942605	1.880476177	0.852446873	2	2.333333333	2.333333333	2	2	2	2	2	2	2	3	3	3204.5	32.807	0.422575464	1	1	0.857142857	0.857142857	2.333333333	-0.333333333	1	1	0	0.857142857	1.160288552	0.666666667	0.666666667	1	1	1	1	0.477499288	1.130585255
121	25	0.040947126	0.029696362	0.022770245	0.007719637	0.020062081	2	0.489950896	2.5059466	3	0	0	0.725236777	0.556088963	0.188526948	2	3	3.333333333	2	2	2	3	3	3	3	3	4	2938.666667	32.394	0.378400677	1	1	0.666666667	0.6	3.333333333	-1.333333333	1	0	0	0.6	0.489950896	0.666666667	0.5	0.666666667	0.666666667	0.666666667	0.666666667	-0.220274202	1.026809595
126	25	0.035039256	0.034382268	0.022565677	0.018622265	0.02519007	2.5	0.718909949	NA	3	0	0	0.981249926	0.644011295	0.531468626	3	3.666666667	4	2.5	2.5	2.5	4	4	3	3	4	5	2938.666667	32.394	0.378400677	1	1	0.818181818	0.75	4	-1.5	0	0	0	0.625	0.718909949	0.625	0.5	0.625	0.625	0.833333333	0.833333333	-0.004425178	NA
127	25	0.053580031	0.056569965	0.02686727	0.01355412	0.032330451	1	0.603404869	2.0059466	3	0	0	1.055803142	0.501441852	0.252969614	2	2.333333333	2.666666667	1.5	1	1	2	2	2	2	3	4	2938.666667	32.394	0.378400677	1.5	1.5	0.857142857	0.75	2.666666667	-1.666666667	1	0	0	0.375	0.603404869	0.333333333	0.25	0.5	0.5	0.5	0.5	-0.078786816	1.011299327
128	25	0.042595097	0.023517429	0.030697531	0.003745296	0.019320085	1.5	0.453575336	NA	3	0	0	0.55211588	0.720682272	0.087927857	2	3	3.333333333	1.5	1.5	1.5	2	2	3	3	4	5	2938.666667	32.394	0.378400677	1	1	0.666666667	0.6	3.333333333	-1.833333333	0	0	0	0.45	0.453575336	0.375	0.3	0.75	0.75	0.5	0.5	-0.252992785	NA
129	25	0.103557669	0.070804163	0.078206971	0.068122312	0.072377815	2	0.698913138	1.5059466	3	0	0	0.683717236	0.755202118	0.657820059	2	2.333333333	2.666666667	2	2	2	2	2	2	2	3	4	2938.666667	32.394	0.378400677	1	1	0.857142857	0.75	2.666666667	-0.666666667	1	0	0	0.75	0.698913138	0.666666667	0.5	1	1	1	1	0.127625776	NA
130	25	0.042475135	0.032757665	0.046210026	0.021300402	0.033422698	2.5	0.786876792	1.4059466	3	0	0	0.771219808	1.087931242	0.501479328	2	3	3.666666667	2	2	2.5	3	3	2	3	4	5	2938.666667	32.394	0.378400677	1	0.8	0.666666667	0.545454545	3.666666667	-1.166666667	0	1	0	0.681818182	0.786876792	0.625	0.5	0.833333333	0.833333333	1.25	0.833333333	0.080042466	1.125352016
139	22	0.111766939	0.085715845	0.092622882	0.06141878	0.079919169	1.5	0.715051959	3.0219986	3	0	0	0.766915916	0.82871449	0.549525471	1	2	2.333333333	1	1	1.5	2	2	2	2	2	3	2395	36.511	0.453968712	1	0.666666667	0.5	0.428571429	2.333333333	-0.833333333	1	0	0	0.642857143	0.715051959	0.75	0.5	0.75	0.75	0.75	0.75	0.161981616	0.978645779
141	26	0.054199964	0.043727665	0.101747987	0.045310157	0.06359527	2	1.173345228	1.180727456	3	0	0	0.80678402	1.87727036	0.835981303	2	2	2.333333333	2	2	2	2	2	2	2	2	3	3070.666667	36.187	0.588641124	1	1	1	0.857142857	2.333333333	-0.333333333	1	1	0	0.857142857	1.173345228	1	0.666666667	1	1	1	1	0.492529224	1.039022318
142	26	0.077824897	0.067944122	0.031397811	0.012156625	0.037166186	2.5	0.477561643	0.680727456	3	0	0	0.873038382	0.403441721	0.156204827	1.666666667	2.666666667	3.666666667	1.5	2	2.5	2	2	3	4	3	5	3070.666667	36.187	0.588641124	0.75	0.6	0.625	0.454545455	3.666666667	-1.166666667	0	0	0	0.681818182	0.477561643	0.833333333	0.5	1.25	1.25	0.833333333	0.625	-0.150828769	1.022596216
143	26	0.104666435	0.020618652	0.026670729	0.005409507	0.017566296	2	0.167831224	1.180727456	3	0	0	0.196993927	0.254816446	0.051683298	2	2.666666667	3.333333333	2	2	2	2	3	3	3	3	4	3070.666667	36.187	0.588641124	1	1	0.75	0.6	3.333333333	-1.333333333	1	0	1	0.6	0.167831224	0.666666667	0.5	1	0.666666667	0.666666667	0.666666667	-0.400995699	1.081139322
144	26	0.090287325	0.011701332	0.01177576	0.019688442	0.014388511	2.5	0.159363578	0.380727456	3	0	0	0.129601053	0.130425391	0.218064291	1.666666667	2.666666667	3	2	2.5	2.5	2	2	3	4	3	3	3070.666667	36.187	0.588641124	0.8	0.8	0.625	0.555555556	3	-0.5	1	0	1	0.833333333	0.159363578	0.833333333	0.833333333	1.25	1.25	0.833333333	0.625	-0.441371723	1.059949327
145	26	0.082049409	0.137343486	0.086162453	0.08980588	0.104437273	2.5	1.272858329	0.080727456	3	0	0	1.673911952	1.050128879	1.094534156	2	2.666666667	3	2	2.5	2.5	2	2	3	3	3	4	3070.666667	36.187	0.588641124	0.8	0.8	0.75	0.666666667	3	-0.5	1	1	0	0.833333333	1.272858329	0.833333333	0.625	1.25	1.25	0.833333333	0.833333333	0.65384244	1.038964628
146	26	0.120699374	0.150537902	0.069409512	0.048168242	0.089371885	2	0.74045028	1.380727456	3	0	0	1.247213609	0.575061075	0.399076155	2	3	3.333333333	2	2	2	2	2	3	3	4	5	3070.666667	36.187	0.588641124	1	1	0.666666667	0.6	3.333333333	-1.333333333	0	1	0	0.6	0.74045028	0.5	0.4	1	1	0.666666667	0.666666667	0.207201715	1.036087538
148	26	0.062962782	0.036261538	NA	0.007293397	0.09463937	2	1.503100203	0.380727456	3	0	0	0.575920208	3.817543768	0.115836634	1.666666667	2.666666667	3	1	1.5	2	2	2	2	2	4	5	3070.666667	36.187	0.588641124	0.666666667	0.5	0.625	0.555555556	3	-1	0	1	0	0.666666667	1.503100203	0.5	0.4	1	1	1	1	0.841729583	1.091309049
149	26	0.082871452	NA	0.119157562	0.093255402	0.119747694	2.5	1.444981241	0.480727456	3	0	0	1.771781652	1.437860182	1.125301889	2	2.666666667	3	2	2.5	2.5	2	3	2	2	4	4	3070.666667	36.187	0.588641124	0.8	0.8	0.75	0.666666667	3	-0.5	1	1	0	0.833333333	1.444981241	0.625	0.625	1.25	0.833333333	1.25	1.25	0.827789532	1.171711126
150	26	0.057011464	0.104495285	0.011583605	0.000989246	0.039022712	2	0.684471329	0.780727456	3	0	0	1.83288199	0.203180285	0.017351712	2	3.333333333	3.666666667	2	2	2	3	3	3	3	4	5	3070.666667	36.187	0.588641124	1	1	0.6	0.545454545	3.666666667	-1.666666667	0	0	0	0.545454545	0.684471329	0.5	0.4	0.666666667	0.666666667	0.666666667	0.666666667	0.009894264	1.086043884
151	27	0.261167476	0.021590094	0.0229134	0.014849891	0.019784462	2	0.075753926	NA	3	0	0	0.08266762	0.087734509	0.056859648	1.666666667	2.333333333	2.666666667	2	2	2	2	2	2	2	3	4	3044.5	39.276	0.578813582	1	1	0.714285714	0.625	2.666666667	-0.666666667	1	0	1	0.75	0.075753926	0.666666667	0.5	1	1	1	1	-0.145784832	NA
152	27	0.204955304	0.210267208	0.035856246	0.008302882	0.084808779	1.5	0.413791578	-0.0540734	3	0	0	1.025917378	0.174946661	0.040510695	2	2.333333333	2.666666667	1.5	1.5	1.5	2	2	2	2	3	4	3044.5	39.276	0.578813582	1	1	0.857142857	0.75	2.666666667	-1.166666667	1	0	0	0.5625	0.413791578	0.5	0.375	0.75	0.75	0.75	0.75	0.067513573	1.092118694
153	27	0.083243816	0.074122017	0.018968807	0.001255587	0.031448803	2	0.377791469	0.9459266	3	0	0	0.890420702	0.22787046	0.015083246	1.666666667	2.666666667	3.333333333	1.5	2	2	2	3	3	3	3	4	3044.5	39.276	0.578813582	0.75	0.75	0.625	0.5	3.333333333	-1.333333333	1	0	0	0.6	0.377791469	0.666666667	0.5	1	0.666666667	0.666666667	0.666666667	-0.238573936	1.090626082
154	27	0.102364389	0.130833113	0.083001047	NA	0.10691708	2.5	1.044475337	0.3459266	3	0	0	1.278111595	0.81083908	NA	2	2.666666667	3.666666667	2	2	2.5	2	2	3	4	3	5	3044.5	39.276	0.578813582	1	0.8	0.75	0.545454545	3.666666667	-1.166666667	0	1	0	0.681818182	1.044475337	0.833333333	0.5	1.25	1.25	0.833333333	0.625	0.470539994	1.110295975
155	27	0.158916654	0.071487105	0.115191763	NA	0.093339434	2	0.587348345	0.8459266	3	0	0	0.449840235	0.724856454	NA	2	2.333333333	3.333333333	2	2	2	2	2	2	3	3	5	3044.5	39.276	0.578813582	1	1	0.857142857	0.6	3.333333333	-1.333333333	0	0	0	0.6	0.587348345	0.666666667	0.4	1	1	1	0.666666667	0.138906941	1.07009427
156	27	0.07425113	0.040927103	0.002180304	0.015872835	0.019660081	2	0.2647782	-0.2540734	3	0	0	0.55119838	0.029363918	0.213772302	2	3.666666667	4.333333333	2	2	2	4	4	3	4	4	5	3044.5	39.276	0.578813582	1	1	0.545454545	0.461538462	4.333333333	-2.333333333	0	0	1	0.461538462	0.2647782	0.5	0.4	0.5	0.5	0.666666667	0.5	-0.371542684	0.960653425
157	27	0.22369321	0.144697948	NA	0.056497512	0.149971986	1	0.670436021	0.7459266	3	0	0	0.646858919	1.111882192	0.252566951	1.333333333	1.333333333	2.333333333	2	1	1	1	2	1	2	2	3	3044.5	39.276	0.578813582	2	2	1	0.571428571	2.333333333	-1.333333333	1	0	0	0.428571429	0.670436021	0.5	0.333333333	1	0.5	1	0.5	0.365738909	1.101327508
158	27	0.070079262	0.090419773	0.012160899	9.22E-09	0.03419356	2	0.48792695	1.8459266	3	0	0	1.290250079	0.173530639	1.31E-07	2	3.333333333	3.666666667	1.5	1.5	2	3	3	3	3	4	5	3044.5	39.276	0.578813582	1	0.75	0.6	0.545454545	3.666666667	-1.666666667	0	0	0	0.545454545	0.48792695	0.5	0.4	0.666666667	0.666666667	0.666666667	0.666666667	-0.15765164	0.961522205
159	27	0.147051535	0.201338971	0.256317965	0.044081532	0.167246156	1	1.137330233	0.0459266	3	0	0	1.369172866	1.743048555	0.299769278	1.333333333	1.666666667	1.666666667	1	1	1	1	1	1	1	3	3	3044.5	39.276	0.578813582	1	1	0.8	0.8	1.666666667	-0.666666667	1	1	0	0.6	1.137330233	0.333333333	0.333333333	1	1	1	1	0.662559193	1.022393045
160	27	0.185450451	0.061474053	0.053201207	0.000672549	0.03844927	1.5	0.207329072	0.9459266	3	0	0	0.331485053	0.286875589	0.003626572	1.666666667	2.333333333	2.666666667	1.5	1.5	1.5	1	2	2	2	4	4	3044.5	39.276	0.578813582	1	1	0.714285714	0.625	2.666666667	-1.166666667	1	0	1	0.5625	0.207329072	0.375	0.375	1.5	0.75	0.75	0.75	-0.182231742	NA
161	51	0.125709809	NA	0.02851863	NA	0.064263007	2.6	0.511201212	4.953470168	5	0	1	0.937711804	0.226860818	NA	1.333333333	4.333333333	5	1	2	2.5	4	5	5	5	4	5	1221	32.6	0.452395965	0.5	0.4	0.307692308	0.266666667	5	-2.5	0	0	0	0.5	0.582286311	0.625	0.5	0.625	0.5	0.5	0.5	0.060156298	NA
162	51	0.18950665	0	0.016858398	NA	0.008429199	2	0.044479701	NA	5	0	1	0	0.088959401	NA	1.333333333	4.333333333	5	1	1.5	2	3	5	5	5	5	5	1221	32.6	0.452395965	0.666666667	0.5	0.307692308	0.266666667	5	-3	0	0	1	0.4	0.044479701	0.4	0.4	0.666666667	0.4	0.4	0.4	-0.336080086	NA
163	51	0.128457455	0.044263704	0.026525982	NA	0.035394843	2	0.275537473	1.953470168	5	0	1	0.344578705	0.206496241	NA	1	3.333333333	4	1	1.5	2	3	3	3	4	4	5	1221	32.6	0.452395965	0.666666667	0.5	0.3	0.25	4	-2	0	0	1	0.5	0.275537473	0.5	0.4	0.666666667	0.666666667	0.666666667	0.5	-0.240495297	NA
164	51	0.207660595	0.076158157	0.027070176	NA	0.051614167	2	0.248550605	NA	5	0	1	0.366743421	0.130357789	NA	1	3	3.333333333	1	1.5	2	2	2	3	3	4	5	1221	32.6	0.452395965	0.666666667	0.5	0.333333333	0.3	3.333333333	-1.333333333	0	0	1	0.6	0.248550605	0.5	0.4	1	1	0.666666667	0.666666667	-0.091724146	NA
166	51	0.054337246	0.037176867	0.056521613	0.015898086	0.036532189	2	0.672323163	1.853470168	5	0	1	0.684187558	1.040200184	0.292581747	2.333333333	3.666666667	3.666666667	2	1.5	2	3	3	3	3	5	5	1221	32.6	0.452395965	1.333333333	1	0.636363636	0.636363636	3.666666667	-1.666666667	0	0	0	0.545454545	0.672323163	0.4	0.4	0.666666667	0.666666667	0.666666667	0.666666667	-0.008188203	NA
167	51	0.093049144	0.051707251	0.067919538	NA	0.059813394	2.5	0.642815091	4.753470168	5	0	1	0.555698295	0.729931887	NA	2.333333333	3.333333333	3.666666667	2.5	2.5	2.5	3	3	3	3	4	5	1221	32.6	0.452395965	1	1	0.7	0.636363636	3.666666667	-1.166666667	0	0	0	0.681818182	0.642815091	0.625	0.5	0.833333333	0.833333333	0.833333333	0.833333333	0.048208484	NA
168	51	0.048644362	0.026161871	0.057254883	NA	0.041708377	2	0.857414413	3.853470168	5	0	1	0.537819188	1.177009638	NA	2.333333333	4.333333333	5	2	2	2	4	5	4	5	5	5	1221	32.6	0.452395965	1	1	0.538461538	0.466666667	5	-3	0	1	0	0.4	0.857414413	0.4	0.4	0.5	0.4	0.5	0.4	0.164270089	NA
171	52	0.049979375	0.038596692	0.026582105	0.029057059	0.031411952	2.5	0.628498295	1.881857318	5	0	1	0.772252391	0.531861496	0.581380999	1.666666667	3.333333333	3.333333333	1.5	2	2.5	3	3	3	3	4	4	NA	NA	NA	0.75	0.6	0.5	0.5	3.333333333	-0.833333333	1	0	0	0.75	0.628498295	0.625	0.625	0.833333333	0.833333333	0.833333333	0.833333333	-0.061683531	NA
176	52	0.06011486	0.0240957	0.025048028	NA	0.024571864	2	0.408748579	NA	5	0	1	0.400827676	0.416669482	NA	2.666666667	3	3.333333333	2	2	2	2	2	3	3	4	5	NA	NA	NA	1	1	0.888888889	0.8	3.333333333	-1.333333333	0	0	0	0.6	0.408748579	0.5	0.4	1	1	0.666666667	0.666666667	-0.258941805	NA
177	52	0.084360333	0.081736532	0.041590049	NA	0.061663291	2.5	0.730951245	0.981857318	5	0	1	0.96889769	0.493004801	NA	3	3.333333333	3.333333333	2	2	2.5	2	2	3	3	5	5	NA	NA	NA	1	0.8	0.9	0.9	3.333333333	-0.833333333	0	0	0	0.75	0.730951245	0.5	0.5	1.25	1.25	0.833333333	0.833333333	0.117063481	1.015809415
178	52	0.083776586	0.028507925	0.100939278	NA	0.064723602	2	0.772573873	1.281857318	5	0	1	0.340285113	1.204862634	NA	2.333333333	2.333333333	3.666666667	1.5	1.5	2	2	4	2	2	3	5	NA	NA	NA	1	0.75	1	0.636363636	3.666666667	-1.666666667	0	1	0	0.545454545	0.772573873	0.666666667	0.4	1	0.5	1	1	0.157390728	1.02050922
179	52	0.0931499	0.115627966	0.025913114	0.030436323	0.057325801	2.5	0.61541452	5.181857318	5	0	1	1.241310677	0.278187247	0.326745637	2.666666667	3.333333333	3.333333333	2.5	2.5	2.5	3	3	3	3	4	4	NA	NA	NA	1	1	0.8	0.8	3.333333333	-0.833333333	1	0	0	0.75	0.61541452	0.625	0.625	0.833333333	0.833333333	0.833333333	0.833333333	0.021031498	1.087429091
201	30	0.051696964	0.03459247	0.026190037	0.002262484	0.021014997	2	0.406503499	NA	4	1	0	0.669139285	0.506606859	0.043764354	2	4	4.666666667	2	2	2	3	4	5	5	4	5	NA	NA	NA	1	1	0.5	0.428571429	4.666666667	-2.666666667	0	0	0	0.428571429	0.406503499	0.5	0.4	0.666666667	0.5	0.4	0.4	-0.279866859	NA
202	30	0.063230351	0.031551115	0.014045852	0.03741235	0.027669772	2.5	0.437602702	NA	4	1	0	0.498986877	0.22213781	0.591683417	1	3.666666667	4.333333333	1	2.5	2.5	3	4	3	4	5	5	NA	NA	NA	0.4	0.4	0.272727273	0.230769231	4.333333333	-1.833333333	0	0	0	0.576923077	0.437602702	0.5	0.5	0.833333333	0.625	0.833333333	0.625	-0.223174161	NA
205	30	0.110104894	0.070739821	0.067884547	0.026045294	0.054889888	2	0.498523598	NA	4	1	0	0.642476633	0.616544325	0.236549835	1.333333333	2.666666667	4	1.5	2	2	2	4	2	3	4	5	NA	NA	NA	0.75	0.75	0.5	0.333333333	4	-2	0	0	0	0.5	0.498523598	0.5	0.4	1	0.5	1	0.666666667	-0.058234955	NA
206	30	0.173461236	0.01132661	0.070755226	0	0.027360612	1.5	0.157733293	NA	4	1	0	0.065297643	0.407902237	0	1.333333333	2.333333333	3.666666667	1.5	1	1.5	2	4	2	2	3	5	NA	NA	NA	1.5	1	0.571428571	0.363636364	3.666666667	-2.166666667	0	0	1	0.409090909	0.157733293	0.5	0.3	0.75	0.375	0.75	0.75	-0.258432535	NA
207	30	0.117044871	0	0.07069591	0	0.023565303	2.5	0.201335635	NA	4	1	0	0	0.604006906	0	1.333333333	2.666666667	4	2	2.5	2.5	2	4	2	3	4	5	NA	NA	NA	0.8	0.8	0.5	0.333333333	4	-1.5	0	0	1	0.625	0.201335635	0.625	0.5	1.25	0.625	1.25	0.833333333	-0.34002256	NA
208	30	0.095911532	0	0.039567136	0	0.013189045	1	0.137512611	NA	4	1	0	0	0.412537834	0	2	3.333333333	4	1.5	2	1	2	4	3	3	5	5	NA	NA	NA	0.75	1.5	0.6	0.5	4	-3	0	0	1	0.25	0.137512611	0.2	0.2	0.5	0.25	0.333333333	0.333333333	-0.450742132	NA
211	35	0.068828321	0.045412501	0.050021726	0.073132059	0.056188762	2.5	0.816361068	0.164871329	4	1	0	0.659793822	0.726760796	1.062528587	2.333333333	3.333333333	3.666666667	2	2.5	2.5	3	4	3	3	4	4	1918	35.009	0.383352901	0.8	0.8	0.7	0.636363636	3.666666667	-1.166666667	1	1	0	0.681818182	0.816361068	0.625	0.625	0.833333333	0.625	0.833333333	0.833333333	0.168006543	0.951864775
216	35	0.106365578	0.017275678	0.042881731	NA	0.030078705	1.5	0.28278608	0.964871329	4	1	0	0.162417941	0.403154219	NA	1.333333333	3.666666667	5	1.5	1	1.5	4	5	3	5	4	5	1918	35.009	0.383352901	1.5	1	0.363636364	0.266666667	5	-3.5	0	0	1	0.3	0.28278608	0.375	0.3	0.375	0.3	0.5	0.3	-0.28227031	1.093655281
217	35	0.062079787	0.009894388	0.01037709	NA	0.010135739	2	0.163269545	NA	4	1	0	0.15938179	0.167157301	NA	1.666666667	4.666666667	5	1	1.5	2	4	5	5	5	5	5	1918	35.009	0.383352901	0.666666667	0.5	0.357142857	0.333333333	5	-3	0	0	1	0.4	0.163269545	0.4	0.4	0.5	0.4	0.4	0.4	-0.500060511	NA
218	35	0.152571537	0.065717056	0.027994451	NA	0.046855753	1.5	0.307106779	-0.435128671	4	1	0	0.430729461	0.183484098	NA	1.333333333	2.666666667	4.333333333	1	1.5	1.5	1	4	3	4	4	5	1918	35.009	0.383352901	0.666666667	0.666666667	0.5	0.307692308	4.333333333	-2.833333333	0	0	1	0.346153846	0.307106779	0.375	0.3	1.5	0.375	0.5	0.375	-0.155414939	1.137126337
219	35	0.122208214	0.007313499	0.030894173	NA	0.019103836	2.5	0.15632203	-0.535128671	4	1	0	0.059844577	0.252799482	NA	3	4	4.666666667	2.5	2	2.5	3	5	4	4	5	5	1918	35.009	0.383352901	1.25	1	0.75	0.642857143	4.666666667	-2.166666667	0	0	1	0.535714286	0.15632203	0.5	0.5	0.833333333	0.5	0.625	0.625	-0.3735783	1.009204675
220	35	0.193403801	0.030070975	0.014614928	NA	0.022342952	1	0.115524884	-0.235128671	4	1	0	0.155482856	0.075566913	NA	1.333333333	2.666666667	5	1	1	1	2	5	2	5	4	5	1918	35.009	0.383352901	1	1	0.5	0.266666667	5	-4	0	0	1	0.2	0.115524884	0.25	0.2	0.5	0.2	0.5	0.2	-0.256386819	1.079921948
221	34	0.083319932	0.007976719	0.002865668	0.011518866	0.007453751	2.333333333	0.089459394	NA	4	1	0	0.095736019	0.034393544	0.13824862	2	3.666666667	4.666666667	3	3	2.5	3	4	4	5	4	5	NA	NA	NA	1	1.2	0.545454545	0.428571429	4.666666667	-2.166666667	0	0	1	0.535714286	0.089459394	0.625	0.5	0.833333333	0.625	0.625	0.5	-0.526737102	NA
222	34	0.068246313	0.043778395	0.062665568	0.013663859	0.040035941	2	0.586638882	NA	4	1	0	0.641476347	0.918226423	0.200213877	1.666666667	3	3.666666667	2	2	2	3	3	3	3	3	5	NA	NA	NA	1	1	0.555555556	0.454545455	3.666666667	-1.666666667	0	0	0	0.545454545	0.586638882	0.666666667	0.4	0.666666667	0.666666667	0.666666667	0.666666667	-0.063007165	NA
223	34	0.17816622	0.046473355	0.034967841	0.017303779	0.032914992	2	0.184743166	NA	4	1	0	0.260842683	0.196265268	0.097121548	1.666666667	3.333333333	4	3	2.5	2	3	4	3	3	4	5	NA	NA	NA	1.2	1.5	0.5	0.416666667	4	-2	0	0	1	0.5	0.184743166	0.5	0.4	0.666666667	0.5	0.666666667	0.666666667	-0.220981931	NA
224	34	0.106919264	0.041881783	0.031975151	0.016423607	0.030093513	2	0.281460161	NA	4	1	0	0.391714091	0.299058833	0.153607558	1.333333333	2.666666667	3	1.5	1	2	2	2	3	3	3	4	NA	NA	NA	1.5	0.75	0.5	0.444444444	3	-1	1	0	1	0.666666667	0.281460161	0.666666667	0.5	1	1	0.666666667	0.666666667	-0.282367555	NA
226	34	0.048079005	0.051311328	0.046177349	0.012476784	0.036655154	1.5	0.762394184	NA	4	1	0	1.067229414	0.960447265	0.259505872	1.333333333	3.333333333	3.333333333	1.5	1.5	1.5	3	3	3	3	4	4	NA	NA	NA	1	1	0.4	0.4	3.333333333	-1.833333333	1	1	0	0.45	0.762394184	0.375	0.375	0.5	0.5	0.5	0.5	0.067995288	NA
228	34	0.049672084	0.034264881	0.017157464	0.05175093	0.032221112	2	0.648676464	NA	4	1	0	0.689821689	0.345414616	1.041851399	1.666666667	3.333333333	3.666666667	1	1	2	3	3	3	3	4	5	NA	NA	NA	1	0.5	0.5	0.454545455	3.666666667	-1.666666667	0	0	0	0.545454545	0.692362568	0.5	0.4	0.666666667	0.666666667	0.666666667	0.666666667	0.00149884	NA
230	34	0.101281893	0.035997268	0.041024063	0	0.025673777	2.5	0.253488323	NA	4	1	0	0.355416621	0.405048347	0	2.333333333	3.333333333	3.666666667	2	2.5	2.5	3	4	3	3	4	4	NA	NA	NA	0.8	0.8	0.7	0.636363636	3.666666667	-1.166666667	1	0	1	0.681818182	0.253488323	0.625	0.625	0.833333333	0.625	0.833333333	0.833333333	-0.322849165	NA
232	33	0.078361794	0.0334841	0.051180363	0.035356941	0.040007135	2	0.510543882	NA	4	1	0	0.427301346	0.653129035	0.451201265	1.333333333	4	4	1	2	2	4	4	4	4	4	4	495.5	33.118	0.292819277	0.5	0.5	0.333333333	0.333333333	4	-2	1	0	0	0.5	0.510543882	0.5	0.5	0.5	0.5	0.5	0.5	-0.116655114	NA
234	33	0.087455526	0.034840602	0.039024311	0.075155923	0.057702859	2	0.659796607	NA	4	1	0	0.398380792	0.446218932	0.85936163	1	4	4.666666667	1.5	1.5	2	4	4	4	5	4	5	495.5	33.118	0.292819277	1	0.75	0.25	0.214285714	4.666666667	-2.666666667	0	0	0	0.428571429	0.567987118	0.5	0.4	0.5	0.5	0.5	0.4	-0.03903217	NA
235	33	0.091856688	0.046918677	0.065358831	0.032169739	0.048149083	2.5	0.524176122	NA	4	1	0	0.510781286	0.711530452	0.350216627	2	3.666666667	4	1.5	2.5	2.5	4	4	4	4	3	4	495.5	33.118	0.292819277	0.6	0.6	0.545454545	0.5	4	-1.5	1	0	0	0.625	0.524176122	0.833333333	0.625	0.625	0.625	0.625	0.625	-0.07307664	NA
236	33	0.085989556	0.081490726	0.046469104	0.019167217	0.049042349	2	0.570329138	NA	4	1	0	0.947681672	0.540404049	0.222901692	1	3.333333333	3.666666667	1	2	2	4	4	3	3	3	4	495.5	33.118	0.292819277	0.5	0.5	0.3	0.272727273	3.666666667	-1.666666667	1	0	0	0.545454545	0.570329138	0.666666667	0.5	0.5	0.5	0.666666667	0.666666667	-0.039943253	NA
238	33	0.092384729	0.076601353	0.054310665	NA	0.065456009	2	0.708515458	NA	4	1	0	0.829155999	0.587874918	NA	1	4	4.333333333	1.5	1.5	2	4	4	4	4	4	5	495.5	33.118	0.292819277	1	0.75	0.25	0.230769231	4.333333333	-2.333333333	0	0	0	0.461538462	0.708515458	0.5	0.4	0.5	0.5	0.5	0.5	0.112434462	NA
239	33	0.164236928	NA	0.021905664	0.028492804	0.025199234	1.5	0.153432203	NA	4	1	0	NA	0.13337843	0.173485976	1	5	5	1	1.5	1.5	5	5	5	5	5	5	495.5	33.118	0.292819277	0.666666667	0.666666667	0.2	0.2	5	-3.5	0	0	1	0.3	0.153432203	0.3	0.3	0.3	0.3	0.3	0.3	-0.283203094	NA
240	33	0.137701327	NA	NA	NA	0.196601986	2	1.42774213	NA	4	1	0	1.264648215	1.590836046	NA	1	4	4.333333333	1	2	2	4	4	4	4	4	5	495.5	33.118	0.292819277	0.5	0.5	0.25	0.230769231	4.333333333	-2.333333333	0	1	0	0.461538462	1.42774213	0.5	0.4	0.5	0.5	0.5	0.5	0.932222242	NA
241	31	0.058974981	0.02276207	0.039473063	0.035528308	0.032587813	2.5	0.552570139	NA	4	1	0	0.385961458	0.669318786	0.602430173	2.333333333	5	5	2	2.5	2.5	5	5	5	5	5	5	1127.5	32.807	0.337121567	0.8	0.8	0.466666667	0.466666667	5	-2.5	0	0	0	0.5	0.552570139	0.5	0.5	0.5	0.5	0.5	0.5	-0.117649726	NA
242	31	0.030259349	0.002971872	0	0.014017851	0.005663241	2.5	0.187156742	NA	4	1	0	0.098213365	0	0.463256861	2.333333333	4.5	4.333333333	1.5	2.5	2.5	4	4	4.5	4	5	5	1127.5	32.807	0.337121567	0.6	0.6	0.518518519	0.538461538	4.333333333	-1.833333333	0	0	1	0.576923077	0.187156742	0.5	0.5	0.625	0.625	0.555555556	0.625	-0.546785377	NA
243	31	0.064960112	0.028714376	0.022803339	0.011574203	0.021030639	2.5	0.323746969	NA	4	1	0	0.442030889	0.351036014	0.178174005	2	4	4.333333333	2	3	2.5	3	4	4	4	5	5	1127.5	32.807	0.337121567	0.666666667	0.8	0.5	0.461538462	4.333333333	-1.833333333	0	0	1	0.576923077	0.323746969	0.5	0.5	0.833333333	0.625	0.625	0.625	-0.333191418	NA
245	31	0.085466427	0.017169725	0.015584084	0.038111167	0.023621659	2	0.276385237	NA	4	1	0	0.200894381	0.182341588	0.445919742	2	5	5	1.5	1.5	2	5	5	5	5	5	5	1127.5	32.807	0.337121567	1	0.75	0.4	0.4	5	-3	0	0	1	0.4	0.276385237	0.4	0.4	0.4	0.4	0.4	0.4	-0.335048018	NA
246	31	0.047271316	0.029183554	0.037323919	0.035862402	0.034123292	2.333333333	0.721860408	NA	4	1	0	0.617362833	0.789568004	0.758650388	1.666666667	2.666666667	5	2	2	2.5	3	5	1	5	4	5	1127.5	32.807	0.337121567	1	0.8	0.625	0.333333333	5	-2.5	0	0	0	0.5	0.721860408	0.625	0.5	0.833333333	0.5	2.5	0.5	0.025669187	NA
250	31	0.074617298	0.020990846	0.032640774	0.004652017	0.019427879	2.5	0.260366957	NA	4	1	0	0.281313401	0.437442449	0.062345022	2.333333333	3.333333333	4	2	2	2.5	3	3	3	4	4	5	1127.5	32.807	0.337121567	1	0.8	0.7	0.583333333	4	-1.5	0	0	1	0.625	0.260366957	0.625	0.5	0.833333333	0.833333333	0.833333333	0.625	-0.375141371	NA
251	39	0.081458341	0.022959369	0	0.008130302	0.010363224	2.5	0.127221148	-0.0693283	4	1	0	0.281854114	0	0.099809329	1.666666667	3.666666667	4.666666667	2.5	2.5	2.5	3	4	4	5	4	5	NA	NA	NA	1	1	0.454545455	0.357142857	4.666666667	-2.166666667	0	0	1	0.535714286	0.127221148	0.625	0.5	0.833333333	0.625	0.625	0.5	-0.493106366	1.22735749
252	39	0.064873232	NA	0.007828702	NA	0.090621942	2.5	1.396908088	NA	4	1	0	2.480154212	0.120676916	1.589893136	1.333333333	3.333333333	4.333333333	2	2	2.5	2	3	4	5	4	5	NA	NA	NA	1	0.8	0.4	0.307692308	4.333333333	-1.833333333	0	1	0	0.576923077	1.396908088	0.625	0.5	1.25	0.833333333	0.625	0.5	0.739776907	0.927146194
253	39	0.116249287	0.089901572	0.141087927	0	0.0769965	2.5	0.662339544	NA	4	1	0	0.773351603	1.213667031	0	1	2.666666667	3.333333333	1.5	2	2.5	2	2	3	3	3	5	NA	NA	NA	0.75	0.6	0.375	0.3	3.333333333	-0.833333333	0	0	0	0.75	0.662339544	0.833333333	0.5	1.25	1.25	0.833333333	0.833333333	0.119215885	0.860252443
254	39	0.055943647	0.025958824	0.010732274	0.021611943	0.019434347	1.5	0.347391498	NA	4	1	0	0.464017382	0.191840802	0.38631631	1	2.666666667	3.333333333	1	1.5	1.5	3	3	3	3	2	4	NA	NA	NA	0.666666667	0.666666667	0.375	0.3	3.333333333	-1.833333333	1	0	0	0.45	0.347391498	0.75	0.375	0.5	0.5	0.5	0.5	-0.329555137	1
255	39	0.103564821	0.025957372	0.034237402	0.015205747	0.025133507	2	0.242683827	0.4306717	4	1	0	0.250638891	0.330589113	0.146823478	1.666666667	3.333333333	3.333333333	2	2	2	3	3	3	3	4	4	NA	NA	NA	1	1	0.5	0.5	3.333333333	-1.333333333	1	0	1	0.6	0.242683827	0.5	0.5	0.666666667	0.666666667	0.666666667	0.666666667	-0.328587663	1.120980121
256	39	0.019989594	0.061319846	0.014207151	0.009577467	0.028368155	2	1.41914611	0.8306717	4	1	0	3.067588334	0.710727349	0.479122648	3	3.333333333	4.333333333	3	2	2	3	4	3	4	4	5	NA	NA	NA	1.5	1.5	0.9	0.692307692	4.333333333	-2.333333333	0	1	0	0.461538462	1.41914611	0.5	0.4	0.666666667	0.5	0.666666667	0.5	0.662414594	0.931798097
257	39	0.081511354	0.097834036	0.063023872	0.007694946	0.056184285	2	0.689281707	0.4306717	4	1	0	1.200250419	0.773191335	0.094403366	2	3	3	2	1.5	2	2	2	3	3	4	4	NA	NA	NA	1.333333333	1	0.666666667	0.666666667	3	-1	1	0	0	0.666666667	0.689281707	0.5	0.5	1	1	0.666666667	0.666666667	0.069071832	1.055988483
258	39	0.057697087	0.052202213	0.014199086	0.01021601	0.025539103	2	0.442641111	NA	4	1	0	0.9047634	0.246097098	0.177062834	2.333333333	3.666666667	4	2.5	2	2	3	3	4	4	4	5	NA	NA	NA	1.25	1.25	0.636363636	0.583333333	4	-2	0	0	0	0.5	0.442641111	0.5	0.4	0.666666667	0.666666667	0.5	0.5	-0.230414501	NA
259	39	0.128936045	0.01174407	0.014348534	0.021093943	0.015728849	2	0.121989544	0.1306717	4	1	0	0.091084463	0.111284119	0.163600049	2.666666667	4.333333333	5	2	1.5	2	4	5	5	5	4	5	NA	NA	NA	1.333333333	1	0.615384615	0.533333333	5	-3	0	0	1	0.4	0.121989544	0.5	0.4	0.5	0.4	0.4	0.4	-0.392981198	1.040753991
260	39	0.041127342	0.01473663	0.02540669	0.042461058	0.027534793	2	0.669500906	0.8306717	4	1	0	0.3583171	0.617756682	1.032428937	2.333333333	3.666666667	3.666666667	1.5	1.5	2	3	3	3	3	5	5	NA	NA	NA	1	0.75	0.636363636	0.636363636	3.666666667	-1.666666667	0	0	0	0.545454545	0.669500906	0.4	0.4	0.666666667	0.666666667	0.666666667	0.666666667	-0.040324279	1.044971401
261	38	0.071896262	0.017122413	0	0.033737695	0.016953369	2	0.235803208	NA	4	1	0	0.238154425	0	0.4692552	2.333333333	3.666666667	4.666666667	2.5	2.5	2	3	4	4	5	4	5	NA	NA	NA	1	1.25	0.636363636	0.5	4.666666667	-2.666666667	0	0	1	0.428571429	0.235803208	0.5	0.4	0.666666667	0.5	0.5	0.4	-0.405743314	NA
263	38	0.07289295	0.040817487	0.028038597	0	0.022952028	2.5	0.31487308	NA	4	1	0	0.559964803	0.384654436	0	2.666666667	3.666666667	4	2	2.5	2.5	3	3	4	4	4	5	NA	NA	NA	0.8	0.8	0.727272727	0.666666667	4	-1.5	0	0	1	0.625	0.31487308	0.625	0.5	0.833333333	0.833333333	0.625	0.625	-0.324461713	NA
264	38	0.109251537	0.069431278	0.043547806	0.033531873	0.048836986	2	0.447014176	NA	4	1	0	0.635517635	0.398601315	0.306923578	2.333333333	3	3	2.5	1.5	2	3	2	3	3	3	4	NA	NA	NA	1.666666667	1.25	0.777777778	0.777777778	3	-1	1	0	0	0.666666667	0.447014176	0.666666667	0.5	0.666666667	1	0.666666667	0.666666667	-0.111638043	NA
265	38	0.095942991	0.042894007	NA	0.032500084	0.099043894	2.5	1.032320266	0.484038095	4	1	0	0.447078061	2.311139031	0.338743706	2	3	3	3	2	2.5	3	2	3	4	3	3	NA	NA	NA	1.5	1.2	0.666666667	0.666666667	3	-0.5	1	1	0	0.833333333	1.032320266	0.833333333	0.833333333	0.833333333	1.25	0.833333333	0.625	0.444135334	1.140359929
267	38	0.144482936	0.087278572	0.058697473	0.028419424	0.058131823	1.5	0.402343868	0.184038095	4	1	0	0.604075297	0.406258863	0.196697444	1	2.666666667	3	1	1	1.5	2	3	3	3	3	3	NA	NA	NA	1	0.666666667	0.375	0.333333333	3	-1.5	1	0	0	0.5	0.402343868	0.5	0.5	0.75	0.5	0.5	0.5	-0.078127096	1
268	38	0.058047819	0.031717477	0.015905793	0.011022222	0.019548497	2	0.336765409	-0.015961905	4	1	0	0.546402565	0.274011905	0.189881756	1.666666667	3	3	1	1	2	3	3	3	3	3	3	NA	NA	NA	1	0.5	0.555555556	0.555555556	3	-1	1	0	0	0.666666667	0.336765409	0.666666667	0.666666667	0.666666667	0.666666667	0.666666667	0.666666667	-0.335511902	0.699297678
269	38	0.080879635	0.047212531	0.037129995	0.028083637	0.037475387	2	0.463347634	0.384038095	4	1	0	0.583738176	0.459077182	0.347227543	2	3	3.666666667	2	1	2	3	3	3	3	3	5	NA	NA	NA	2	1	0.666666667	0.545454545	3.666666667	-1.666666667	0	0	0	0.545454545	0.463347634	0.666666667	0.4	0.666666667	0.666666667	0.666666667	0.666666667	-0.158264075	0.750517071
270	38	0.056556366	0.012864742	0.016819929	0.017572817	0.015752496	1.5	0.27852737	0.284038095	4	1	0	0.227467621	0.297401163	0.310713328	1.333333333	3	3.666666667	1.5	1	1.5	3	3	3	3	3	5	NA	NA	NA	1.5	1	0.444444444	0.363636364	3.666666667	-2.166666667	0	0	1	0.409090909	0.27852737	0.5	0.3	0.5	0.5	0.5	0.5	-0.397059593	1.021745793
272	37	0.13496794	0.023677651	0.024417739	0.001214397	0.018431881	2	0.136564887	NA	4	1	0	0.17543167	0.180915104	0.008997669	1.666666667	3.333333333	4	2	2	2	3	3	3	4	4	5	NA	NA	NA	1	1	0.5	0.416666667	4	-2	0	0	1	0.5	0.121781481	0.5	0.4	0.666666667	0.666666667	0.666666667	0.5	-0.37980401	NA
274	37	0.148143796	0.085333181	0	0	0.028444394	1.4	0.192005298	NA	4	1	0	0.576015894	0	0	2	3.666666667	4.333333333	2.5	2.5	1.5	3	3	4	5	4	5	NA	NA	NA	1	1.666666667	0.545454545	0.461538462	4.333333333	-2.833333333	0	0	1	0.346153846	0.192005298	0.375	0.3	0.5	0.5	0.375	0.3	-0.280341927	NA
275	37	0.090694482	0.076651949	0.076243375	0.008246081	0.053713802	2.5	0.59224994	NA	4	1	0	0.84516662	0.840661666	0.090921532	2	3.666666667	4.333333333	2.5	2.5	2.5	3	4	4	4	4	5	NA	NA	NA	1	1	0.545454545	0.461538462	4.333333333	-1.833333333	0	0	0	0.576923077	0.59224994	0.625	0.5	0.833333333	0.625	0.625	0.625	-0.007581848	NA
276	37	0.031369329	0.014282484	0.009735441	0.04031235	0.021443425	2	0.68357933	NA	4	1	0	0.455300894	0.310349029	1.285088067	1.666666667	4	4.666666667	2	1.5	2	3	4	4	5	5	5	NA	NA	NA	1.333333333	1	0.416666667	0.357142857	4.666666667	-2.666666667	0	0	0	0.428571429	0.68357933	0.4	0.4	0.666666667	0.5	0.5	0.4	-0.047899656	NA
277	37	0.069968887	0.059978288	0.014866882	0.033047061	0.035964077	1.5	0.514000982	NA	4	1	0	0.857213691	0.212478463	0.472310793	1.333333333	3	3.333333333	1.5	1	1.5	3	2	3	3	3	5	NA	NA	NA	1.5	1	0.444444444	0.4	3.333333333	-1.833333333	0	0	0	0.45	0.514000982	0.5	0.3	0.5	0.75	0.5	0.5	-0.131822536	NA
278	37	0.039547001	0.013552272	NA	0.007497994	0.010525133	1.5	0.266142382	NA	4	1	0	0.342687733	NA	0.189597032	2	3.333333333	3.666666667	1.5	1	1.5	3	3	3	4	4	4	NA	NA	NA	1.5	1	0.6	0.545454545	3.666666667	-2.166666667	1	0	1	0.409090909	0.266142382	0.375	0.375	0.5	0.5	0.5	0.375	-0.447189704	NA
279	37	0.12392391	0.082552297	0.107162706	0.01950662	0.069740541	2	0.562769051	NA	4	1	0	0.666153103	0.864746007	0.157408043	2	3.333333333	3.333333333	1.5	1.5	2	3	3	3	3	4	4	NA	NA	NA	1	0.75	0.6	0.6	3.333333333	-1.333333333	1	0	0	0.6	0.562769051	0.5	0.5	0.666666667	0.666666667	0.666666667	0.666666667	0.036675986	NA
280	37	0.030150425	0.037458182	0.024118879	0.02959365	0.030390237	2	1.007953866	NA	4	1	0	1.242376592	0.799951561	0.981533444	1.666666667	3.333333333	3	2	2	2	3	3	3	3	4	3	NA	NA	NA	1	1	0.5	0.555555556	3	-1	1	1	0	0.666666667	1.007953866	0.5	0.666666667	0.666666667	0.666666667	0.666666667	0.666666667	0.273770035	NA
281	40	0.103694441	0.064167174	0.055413169	NA	0.059790172	1.5	0.576599584	0.696718338	4	1	0	0.618810161	0.534389007	NA	1.333333333	2.333333333	2	1	1.5	1.5	2	1	4	4	NA	NA	540	32.188	0.36163479	0.666666667	0.666666667	0.571428571	0.666666667	2.5	-1	0	0	0	0.6	0.576599584	NA	NA	0.75	1.5	0.375	0.375	0.005615731	1.092910448
282	40	0.089992665	0.085800599	0.027202469	NA	0.056501534	2	0.627845997	0.396718338	4	1	0	0.953417698	0.302274295	NA	2	2	2.666666667	2	1.5	2	2	2	3	5	NA	NA	540	32.188	0.36163479	1.333333333	1	1	0.75	3.5	-1.5	0	0	0	0.571428571	0.627845997	NA	NA	1	1	0.666666667	0.4	0.02645682	1.032179086
284	40	0.144199891	0.116582731	0.084555988	NA	0.100569359	2.5	0.697430206	-0.203281662	4	1	0	0.808480024	0.586380388	NA	2	2.333333333	2.666666667	2	2	2.5	3	3	3	3	NA	NA	540	32.188	0.36163479	1	0.8	0.857142857	0.75	3	-0.5	1	0	0	0.833333333	0.697430206	NA	NA	0.833333333	0.833333333	0.833333333	0.833333333	0.216331143	1.044905373
286	40	0.134511334	0.077875977	0.041431748	NA	0.059653862	2.5	0.44348577	-0.003281662	4	1	0	0.578954758	0.308016781	NA	2.333333333	3	2.666666667	2.5	2	2.5	4	3	3	3	NA	NA	540	32.188	0.36163479	1.25	1	0.777777778	0.875	3	-0.5	1	0	0	0.833333333	0.44348577	NA	NA	0.625	0.833333333	0.833333333	0.833333333	-0.059112967	1.065089772
287	40	0.158763677	0.120996432	0.082735182	NA	0.101865807	1.5	0.641619098	0.596718338	4	1	0	0.762116589	0.521121606	NA	1	1.666666667	3	1.5	2	1.5	1	2	3	5	NA	NA	540	32.188	0.36163479	0.75	1	0.6	0.333333333	3.5	-2	0	0	0	0.428571429	0.641619098	NA	NA	1.5	0.75	0.5	0.3	0.192838226	1.052028328
289	40	0.118911614	0.059049575	0.039197634	NA	0.049123604	2.5	0.413110231	-0.003281662	4	1	0	0.496583749	0.329636712	NA	1	3	3.333333333	2.25	2.5	2.5	3	3	5	5	NA	NA	540	32.188	0.36163479	0.9	0.9	0.333333333	0.3	4	-1.5	0	0	0	0.625	0.413110231	NA	NA	0.833333333	0.833333333	0.5	0.5	-0.124105514	1.065089772
290	40	0.124084022	0.040866402	0.052391145	NA	0.046628773	2	0.375783864	-0.203281662	4	1	0	0.329344592	0.422223136	NA	2	3	2.666666667	2	2	2	3	3	4	3	NA	NA	540	32.188	0.36163479	1	1	0.666666667	0.75	3	-1	1	0	0	0.666666667	0.375783864	NA	NA	0.666666667	0.666666667	0.5	0.666666667	-0.1499539	1.098854227
293	41	0.150245137	0.133736739	0.0886814	NA	0.11120907	1.5	0.740184152	0.792254243	4	1	0	0.890123579	0.590244724	NA	2	2.666666667	2.333333333	2.5	1.5	1.5	2	2	3	3	NA	NA	558	33.014	0.343831456	1.666666667	1.666666667	0.75	0.857142857	2.5	-1	1	1	0	0.6	0.740184152	NA	NA	0.75	0.75	0.5	0.5	0.272499968	1.104727488
294	41	0.133018928	0.056250992	0.043130362	NA	0.049690677	1.5	0.373560948	0.492254243	4	1	0	0.422879607	0.324242289	NA	2.333333333	2.666666667	3	2	1.5	1.5	2	3	4	4	NA	NA	558	33.014	0.343831456	1.333333333	1.333333333	0.875	0.777777778	3.5	-2	0	0	0	0.428571429	0.373560948	NA	NA	0.75	0.5	0.375	0.375	-0.132349554	NA
295	41	0.134808257	0.060517413	0.036272098	NA	0.048394755	1.5	0.358989549	NA	4	1	0	0.448914733	0.269064365	NA	1.666666667	2.833333333	3	2	1	1.5	2.5	3	5	5	NA	NA	558	33.014	0.343831456	2	1.333333333	0.588235294	0.555555556	4	-2.5	0	0	0	0.375	0.358989549	NA	NA	0.6	0.5	0.3	0.3	-0.14295029	NA
296	41	0.111679877	0.075307136	0.061095193	NA	0.068201164	2.5	0.610684452	0.592254243	4	1	0	0.674312489	0.547056415	NA	1	2.333333333	2.666666667	2.5	2	2.5	3	2	3	4	NA	NA	558	33.014	0.343831456	1.25	1	0.428571429	0.375	3	-0.5	0	0	0	0.833333333	0.610684452	NA	NA	0.833333333	1.25	0.833333333	0.625	0.05742091	1.073537664
297	41	0.087019261	0.124222935	0.115752719	NA	0.119987827	2.75	1.378865151	-0.107745757	4	1	0	1.427533779	1.330196524	NA	1.333333333	1.666666667	1.666666667	2	1.5	2.75	1	2	2	2	NA	NA	558	33.014	0.343831456	1.333333333	0.727272727	0.8	0.8	2	0.75	1	1	0	1.375	1.378865151	NA	NA	2.75	1.375	1.375	1.375	0.770877758	1.152465513
298	41	0.134800106	0.115333943	0.03701424	NA	0.076174092	1	0.565089257	-0.307745757	4	1	0	0.855592378	0.274586135	NA	1	1.333333333	3	1	1	1	1	3	2	5	NA	NA	558	33.014	0.343831456	1	1	0.75	0.333333333	4	-3	0	0	0	0.25	0.565089257	NA	NA	1	0.333333333	0.5	0.2	0.063131329	1.079594068
299	41	0.212635382	0.188554692	0.104018853	NA	0.146286773	1	0.687970042	NA	4	1	0	0.886751255	0.489188829	NA	1.666666667	1.666666667	2	1.5	1	1	1	1	2	3	NA	NA	558	33.014	0.343831456	1.5	1.5	1	0.833333333	2	-1	1	0	0	0.5	0.687970042	NA	NA	1	1	0.5	0.333333333	0.358734736	NA
300	41	0.095731953	0.10590301	0.037093267	NA	0.071498139	2	0.746857626	0.292254243	4	1	0	1.106245172	0.387470081	NA	2.333333333	2.666666667	3.666666667	2.5	2	2	2	3	4	5	NA	NA	558	33.014	0.343831456	1.25	1.25	0.875	0.636363636	4	-2	0	1	0	0.5	0.746857626	NA	NA	1	0.666666667	0.5	0.4	0.158204383	1.108787351
301	42	0.065217752	0.063877958	0.032706728	NA	0.048292343	1.5	0.740478497	1.05396368	4	1	0	0.979456608	0.501500385	NA	2	3	4	1.5	2	1.5	2	4	4	5	NA	NA	205	31.983	0.293969533	0.75	1	0.666666667	0.5	4.5	-3	0	1	0	0.333333333	0.740478497	NA	NA	0.75	0.375	0.375	0.3	0.084111833	1.085807141
302	42	0.107154895	0.138815077	0.052386868	NA	0.095600972	2	0.892175504	NA	4	1	0	1.295461832	0.488889177	NA	1.666666667	2.333333333	2.666666667	2	1.5	2	2	2	3	3	NA	NA	205	31.983	0.293969533	1.333333333	1	0.714285714	0.625	2.5	-0.5	1	1	0	0.8	0.892175504	NA	NA	1	1	0.666666667	0.666666667	0.328870671	NA
304	42	0.101590557	0.026345022	0.065681831	NA	0.046013426	2	0.452930152	0.65396368	4	1	0	0.259325503	0.646534801	NA	3.666666667	3.833333333	4	2	2.5	2	4	4	4	5	NA	NA	205	31.983	0.293969533	0.8	1	0.956521739	0.916666667	4.5	-2.5	0	0	0	0.444444444	0.452930152	NA	NA	0.5	0.5	0.5	0.4	-0.122722386	1.034989594
306	42	0.096752869	NA	0	NA	0.116311389	2.5	1.202149251	0.95396368	4	1	0	2.404298503	0	NA	2.666666667	3	3.666666667	2.5	2.5	2.5	2	2	4	5	NA	NA	205	31.983	0.293969533	1	1	0.888888889	0.727272727	3.5	-1	0	1	0	0.714285714	1.202149251	NA	NA	1.25	1.25	0.625	0.5	0.615761501	1.062198123
307	42	0.177393579	0.184326623	0.034121637	NA	0.10922413	2	0.615716365	1.15396368	4	1	0	1.039082832	0.192349899	NA	2.333333333	2.666666667	3.333333333	2	2.5	2	2	2	3	5	NA	NA	205	31.983	0.293969533	0.8	1	0.875	0.7	3.5	-1.5	0	0	0	0.571428571	0.615716365	NA	NA	1	1	0.666666667	0.4	0.208276717	1.044971401
308	42	0.112989441	NA	0.122360723	NA	0.150898456	2.5	1.335509352	0.65396368	4	1	0	1.588079261	1.082939443	NA	3	3	3.333333333	2.5	2.5	2.5	3	3	3	4	NA	NA	205	31.983	0.293969533	1	1	1	0.9	3.5	-1	0	1	0	0.714285714	1.335509352	NA	NA	0.833333333	0.833333333	0.833333333	0.625	0.785151838	1.066461962
318	43	0.169122314	0.093818723	0	NA	0.046909362	2.5	0.277369441	0.581564469	4	1	0	0.554738881	0	NA	2.666666667	3	4	2.5	2.5	2.5	3	4	3	5	NA	NA	686.25	33.222	0.389501277	1	1	0.888888889	0.666666667	4.5	-2	0	0	1	0.555555556	0.277369441	NA	NA	0.833333333	0.625	0.833333333	0.5	-0.148424799	1.01247883
322	36	0.080022803	0.080844327	0.028525478	0.02249692	0.043955575	1	0.549288122	NA	4	1	0	1.010266127	0.356466871	0.281131368	1.333333333	3	4.333333333	1	1	1	2	3	3	5	4	5	1933.5	34.479	0.432509403	1	1	0.444444444	0.307692308	4.333333333	-3.333333333	0	0	0	0.230769231	0.549288122	0.25	0.2	0.5	0.333333333	0.333333333	0.2	-0.074224966	NA
324	36	0.055113338	0.040792894	0.034309815	0.020328545	0.031810418	2	0.577181839	-0.19871744	4	1	0	0.740163736	0.622531964	0.368849817	1	3.666666667	3.666666667	1.5	2	2	3	3	4	4	4	4	1933.5	34.479	0.432509403	0.75	0.75	0.272727273	0.272727273	3.666666667	-1.666666667	1	0	0	0.545454545	0.577181839	0.5	0.5	0.666666667	0.666666667	0.5	0.5	-0.101607317	1.018724848
325	36	0.066874097	0.037996879	0.028599572	0.020000236	0.028865562	1.5	0.431640405	-0.19871744	4	1	0	0.568185302	0.427662924	0.29907299	1.666666667	3.333333333	3.333333333	1	1.5	1.5	3	3	3	3	4	4	1933.5	34.479	0.432509403	0.666666667	0.666666667	0.5	0.5	3.333333333	-1.833333333	1	0	0	0.45	0.431640405	0.375	0.375	0.5	0.5	0.5	0.5	-0.221050697	1.191259677
326	36	0.107101706	0	0	NA	0	2.5	0	-0.19871744	4	1	0	0	0	NA	2	3.666666667	4.666666667	2	2.5	2.5	3	5	3	4	5	5	1933.5	34.479	0.432509403	0.8	0.8	0.545454545	0.428571429	4.666666667	-2.166666667	0	0	1	0.535714286	0	0.5	0.5	0.833333333	0.5	0.833333333	0.625	-0.563422864	1.031110743
327	36	0.028430207	0.031007338	0.008908906	0.017667955	0.019194733	1	0.675152763	-0.09871744	4	1	0	1.090647626	0.313360568	0.621450097	1.833333333	4.333333333	4.333333333	1.5	1	1	4	4	4	4	5	5	1933.5	34.479	0.432509403	1.5	1.5	0.423076923	0.423076923	4.333333333	-3.333333333	0	0	0	0.230769231	0.675152763	0.2	0.2	0.25	0.25	0.25	0.25	-0.062848366	1.033601981
332	32	0.05914944	0.049591375	0.014377291	0.028190497	0.030719721	2	0.519357766	1.02856704	4	1	0	0.838408189	0.243067239	0.476597871	2	3.666666667	4.333333333	2	2	2	3	4	4	4	4	5	871	32.497	0.334901245	1	1	0.545454545	0.461538462	4.333333333	-2.333333333	0	0	0	0.461538462	0.519357766	0.5	0.4	0.666666667	0.5	0.5	0.5	-0.150474961	1.02161292
333	32	0.038019566	0.026336712	0.016197439	0.018949937	0.020494696	2	0.539056553	0.62856704	4	1	0	0.692714705	0.426029032	0.498425924	2.666666667	4	4.333333333	2	2	2	3	4	4	4	5	5	871	32.497	0.334901245	1	1	0.666666667	0.615384615	4.333333333	-2.333333333	0	0	0	0.461538462	0.539056553	0.4	0.4	0.666666667	0.5	0.5	0.5	-0.177665032	1.060287491
334	32	0.068401904	0.050941227	0	0	0.016980409	2	0.248244683	1.02856704	4	1	0	0.744734048	0	0	1.666666667	4	4.666666667	1.5	2	2	3	5	4	4	5	5	871	32.497	0.334901245	0.75	0.75	0.416666667	0.357142857	4.666666667	-2.666666667	0	0	1	0.428571429	0.248244683	0.4	0.4	0.666666667	0.4	0.5	0.5	-0.401056097	1.083437164
335	32	0.04343129	0.00964698	0.02209441	0.040594726	0.024112039	2.5	0.55517666	1.268661547	4	1	0	0.22212051	0.508721011	0.934688459	2.333333333	3.666666667	5	2.5	2.25	2.5	3	5	4	5	4	5	871	32.497	0.334901245	1.111111111	1	0.636363636	0.466666667	5	-2.5	0	0	0	0.5	0.55517666	0.625	0.5	0.833333333	0.5	0.625	0.5	-0.149535882	0.993150436
336	32	0.19182457	0.035356463	0	NA	0.026517347	1.5	0.138237491	NA	4	1	0	0.184316655	0	NA	1.333333333	2.666666667	4	1	1.5	1.5	3	5	2	2	3	5	871	32.497	0.334901245	0.666666667	0.666666667	0.5	0.333333333	4	-2.5	0	0	1	0.375	0.092158328	0.5	0.3	0.5	0.3	0.75	0.75	-0.283257813	NA
338	32	0.14266217	0.031978975	0.063185746	NA	0.04758236	2	0.333531729	1.32856704	4	1	0	0.224158758	0.442904701	NA	2	3.333333333	4	1.5	2.5	2	3	4	3	3	4	5	871	32.497	0.334901245	0.6	0.75	0.6	0.5	4	-2	0	0	1	0.5	0.333531729	0.5	0.4	0.666666667	0.5	0.666666667	0.666666667	-0.150979657	0.964798103
339	32	0.120563958	0.054449554	0.061972042	NA	0.058210798	2	0.482820892	1.32856704	4	1	0	0.451623805	0.514017978	NA	2.333333333	3.333333333	4	2	2	2	3	4	3	3	4	5	871	32.497	0.334901245	1	1	0.7	0.583333333	4	-2	0	0	0	0.5	0.482820892	0.5	0.4	0.666666667	0.5	0.666666667	0.666666667	-0.050728171	1.061014738
340	32	0.102124176	0.03270508	0.091745866	NA	0.062225473	2.5	0.609311872	1.22856704	4	1	0	0.320248167	0.898375576	NA	2	3.333333333	4	2	2.5	2.5	3	4	3	3	4	5	871	32.497	0.334901245	0.8	0.8	0.6	0.5	4	-1.5	0	0	0	0.625	0.609311872	0.625	0.5	0.833333333	0.625	0.833333333	0.833333333	0.034843477	1.005566515
344	44	0.162031744	0.100630921	0.067935333	NA	0.084283127	1.5	0.520164289	NA	4	1	0	0.621056825	0.419271753	NA	2	2	2.833333333	2.5	1.5	1.5	2	3	2	3.5	NA	NA	486	32.188	0.325602272	1.666666667	1.666666667	1	0.705882353	3.25	-1.75	0	0	0	0.461538462	0.520164289	NA	NA	0.75	0.5	0.75	0.428571429	0.078635516	NA
351	62	0.198818798	0.116566898	0.128471608	0.067981514	0.104340006	2	0.524799504	0.11624864	5	1	1	0.586297167	0.646174351	0.341926994	2	3	3.666666667	1.5	1	2	3	3	3	4	3	4	1321.5	33.326	0.461027211	1.5	0.75	0.666666667	0.545454545	3.666666667	-1.666666667	1	0	0	0.545454545	0.524799504	0.666666667	0.5	0.666666667	0.666666667	0.666666667	0.5	0.164904107	NA
352	62	0.112001674	0.164132829	0.062077412	0.052135924	0.092782055	1.5	0.828398824	0.11624864	5	1	1	1.465449784	0.554254328	0.465492361	1	2.666666667	3.333333333	1	1	1.5	2	2	3	4	3	4	1321.5	33.326	0.461027211	1	0.666666667	0.375	0.3	3.333333333	-1.833333333	1	1	0	0.45	0.828398824	0.5	0.375	0.75	0.75	0.5	0.375	0.275849376	1.107889059
353	62	0.049988038	0.055751541	0.064358022	0.034038095	0.051382553	2	1.027896981	NA	5	1	1	1.115297654	1.287468472	0.680924815	1.666666667	3.333333333	3.333333333	1.5	1.5	2	3	3	3	3	4	4	1321.5	33.326	0.461027211	1	0.75	0.5	0.5	3.333333333	-1.333333333	1	1	0	0.6	1.027896981	0.5	0.5	0.666666667	0.666666667	0.666666667	0.666666667	0.337734379	NA
356	62	0.053007905	0.056840601	0.053403177	0.060153688	0.056799155	2.5	1.071522352	NA	5	1	1	1.072304234	1.007456846	1.134805975	2	4	4	1.5	2	2.5	4	4	4	4	4	4	1321.5	33.326	0.461027211	0.75	0.6	0.5	0.5	4	-1.5	1	1	0	0.625	1.071522352	0.625	0.625	0.625	0.625	0.625	0.625	0.388061074	NA
359	62	0.040922384	0.027538877	0.070896924	NA	0.0492179	2.5	1.20271342	NA	5	1	1	0.67295387	1.73247297	NA	1.333333333	3	3.333333333	1	1.5	2.5	3	3	2	2	4	5	1321.5	33.326	0.461027211	0.666666667	0.4	0.444444444	0.4	3.333333333	-0.833333333	0	1	0	0.75	1.20271342	0.625	0.5	0.833333333	0.833333333	1.25	1.25	0.492433417	NA
360	62	0.042745913	0	0.01691854	NA	0.00845927	2.5	0.197896578	NA	5	1	1	0	0.395793156	NA	1.666666667	4	4.333333333	1.5	2	2.5	4	4	4	4	4	5	1321.5	33.326	0.461027211	0.75	0.6	0.416666667	0.384615385	4.333333333	-1.833333333	0	0	1	0.576923077	0.197896578	0.625	0.5	0.625	0.625	0.625	0.625	-0.508336869	NA
371	65	0.066491364	0.043896605	0.017750375	0.020130216	0.027259065	1.5	0.409963998	1.816759179	5	1	1	0.660185061	0.266957595	0.302749338	1	3.333333333	3.666666667	1	1.5	1.5	3	3	4	4	3	4	151.3333333	31.88	0.260238606	0.666666667	0.666666667	0.3	0.272727273	3.666666667	-2.166666667	1	0	0	0.409090909	0.409963998	0.5	0.375	0.5	0.5	0.375	0.375	-0.243576421	1
372	65	0.058682733	0.127451302	0.063477205	0.057589261	0.082839256	1.5	1.411646185	0.516759179	5	1	1	2.171870602	1.081701575	0.981366377	1	2.666666667	2.666666667	1	1.5	1.5	2	1	3	3	3	4	151.3333333	31.88	0.260238606	0.666666667	0.666666667	0.375	0.375	2.666666667	-1.166666667	1	1	0	0.5625	1.411646185	0.5	0.375	0.75	1.5	0.5	0.5	0.740777798	1.033459205
373	65	0.088270422	0.183399048	0.11922348	NA	0.158583479	1	1.79656419	1.816759179	5	1	1	2.077695375	1.350661723	1.961335472	1	2.333333333	2.833333333	1	1	1	2	2	2	3.5	3	3	151.3333333	31.88	0.260238606	1	1	0.428571429	0.352941176	2.833333333	-1.833333333	1	1	0	0.352941176	1.79656419	0.333333333	0.333333333	0.5	0.5	0.5	0.285714286	1.191353221	1.120124707
374	65	0.147760631	0.157401265	0.114926892	0.105370591	0.125899583	2	0.852050928	1.016759179	5	1	1	1.065244942	0.777791021	0.71311682	1	2.666666667	3	1	1.5	2	1	1	3	4	4	4	151.3333333	31.88	0.260238606	0.666666667	0.5	0.375	0.333333333	3	-1	1	1	0	0.666666667	0.852050928	0.5	0.5	2	2	0.666666667	0.5	0.378853429	1.095310074
375	65	0.182856383	NA	0.065271879	NA	0.097373895	1.5	0.532515699	1.416759179	5	1	1	0.708074328	0.356957071	NA	1	4.333333333	5	1	1.5	1.5	4	5	5	5	4	5	151.3333333	31.88	0.260238606	0.666666667	0.666666667	0.230769231	0.2	5	-3.5	0	0	0	0.3	0.532515699	0.375	0.3	0.375	0.3	0.3	0.3	0.137198445	1.018394133
379	65	0.213778543	0.125807609	0.048223989	NA	0.087015799	1.5	0.407037105	0.616759179	5	1	1	0.588495026	0.225579183	NA	1.333333333	3.333333333	4.333333333	1	1.5	1.5	3	4	4	4	3	5	151.3333333	31.88	0.260238606	0.666666667	0.666666667	0.4	0.307692308	4.333333333	-2.833333333	0	0	0	0.346153846	0.407037105	0.5	0.3	0.5	0.375	0.375	0.375	0.080338562	1.129454196
381	61	0.106153892	0.069029855	0.07710331	0.046614758	0.064249308	1.5	0.605246842	0.334654566	5	1	1	0.650280963	0.726335216	0.439124347	1.666666667	3.333333333	3	1.5	1.5	1.5	3	3	3	2	4	4	1526	33.326	0.41881165	1	1	0.5	0.555555556	3	-1.5	1	0	0	0.5	0.605246842	0.375	0.375	0.5	0.5	0.5	0.75	0.039720704	1.055622593
382	61	0.136663916	0.138557495	0.143482989	NA	0.141020242	1.5	1.0318762	0.434654566	5	1	1	1.013855736	1.049896663	NA	1	2	1.666666667	1	1.5	1.5	2	1	2	2	2	2	1526	33.326	0.41881165	0.666666667	0.666666667	0.5	0.6	1.666666667	-0.166666667	1	1	0	0.9	1.0318762	0.75	0.75	0.75	1.5	0.75	0.75	0.534054213	1.024619884
383	61	0.101029487	0.130396106	0.106060519	0.116358865	0.117605163	2	1.164067705	0.434654566	5	1	1	1.290673739	1.049797656	1.151731719	1	2.333333333	2.666666667	1.5	1.5	2	2	2	3	3	2	3	1526	33.326	0.41881165	1	0.75	0.428571429	0.375	2.666666667	-0.666666667	1	1	0	0.75	1.164067705	1	0.666666667	1	1	0.666666667	0.666666667	0.587170108	1.030540352
384	61	0.21696748	0.178709925	0.115772252	0.0614357	0.118639292	1	0.546806793	-0.165345434	5	1	1	0.823671478	0.533592644	0.283156257	1.666666667	2	2.333333333	1.5	1.5	1	1	1	2	2	3	4	1526	33.326	0.41881165	1	1.5	0.833333333	0.714285714	2.333333333	-1.333333333	1	0	0	0.428571429	0.546806793	0.333333333	0.25	1	1	0.5	0.5	0.227184755	NA
385	61	0.019793993	0.020281358	0.006314324	0.00699026	0.011195314	2	0.565591494	0.334654566	5	1	1	1.02462188	0.319002023	0.353150579	1.666666667	3.666666667	3.666666667	2	2	2	3	3	4	4	4	4	1526	33.326	0.41881165	1	1	0.454545455	0.454545455	3.666666667	-1.666666667	1	0	0	0.545454545	0.565591494	0.5	0.5	0.666666667	0.666666667	0.5	0.5	-0.191574076	1.0510429
388	61	0.07521251	0.078877853	0.066647249	0.021045595	0.055523566	2	0.738222482	NA	5	1	1	1.048733159	0.886119198	0.27981509	1.333333333	3	4	1	1.5	2	3	4	3	3	3	5	1526	33.326	0.41881165	0.666666667	0.5	0.444444444	0.333333333	4	-2	0	1	0	0.5	0.738222482	0.666666667	0.4	0.666666667	0.5	0.666666667	0.666666667	0.104034976	NA
391	60	0.140352814	0.030578769	0.033746683	0.060811548	0.041712334	2	0.297196276	NA	5	1	1	0.217870726	0.2404418	0.433276303	1.333333333	3.666666667	3.333333333	1	1.5	2	3	2	3	3	5	5	1515	32.807	0.477653483	0.666666667	0.5	0.363636364	0.4	3.333333333	-1.333333333	0	0	1	0.6	0.297196276	0.4	0.4	0.666666667	1	0.666666667	0.666666667	-0.192439754	NA
392	60	0.026622265	0.021104902	0.015976158	0.010268936	0.015783332	2.5	0.592862114	NA	5	1	1	0.79275381	0.600105152	0.385727379	1.666666667	3.666666667	3.666666667	1.5	2	2.5	3	3	3	3	5	5	1515	32.807	0.477653483	0.75	0.6	0.454545455	0.454545455	3.666666667	-1.166666667	0	0	0	0.681818182	0.592862114	0.5	0.5	0.833333333	0.833333333	0.833333333	0.833333333	-0.149150983	NA
394	60	0.059520344	0.040259337	0.056319794	0.062054824	0.052877985	1.5	0.888401868	0.68169	5	1	1	0.676396238	0.946227627	1.04258174	1	2.666666667	2.333333333	1.5	1	1.5	3	2	2	2	3	3	1515	32.807	0.477653483	1.5	1	0.375	0.428571429	2.333333333	-0.833333333	1	1	0	0.642857143	0.888401868	0.5	0.5	0.5	0.75	0.75	0.75	0.219392207	NA
395	60	0.026019009	0.034474455	0.012731656	0.024835593	0.024013901	2.5	0.922936797	1.38169	5	1	1	1.324971844	0.489321304	0.954517241	2	3.333333333	3.666666667	2	2	2.5	3	3	3	4	4	4	1515	32.807	0.477653483	1	0.8	0.6	0.545454545	3.666666667	-1.166666667	1	1	0	0.681818182	0.922936797	0.625	0.625	0.833333333	0.833333333	0.833333333	0.625	0.179585029	1.04141731
397	60	0.068067064	0.071189757	0.02948659	NA	0.050338173	2.666666667	0.739537895	0.68169	5	1	1	1.04587671	0.43319908	NA	2	4	4.333333333	1.5	2.5	2.5	4	4	4	4	4	5	1515	32.807	0.477653483	0.6	0.6	0.5	0.461538462	4.333333333	-1.833333333	0	1	0	0.576923077	0.739537895	0.625	0.5	0.625	0.625	0.625	0.625	0.089494081	1.052117629
398	60	0.103670426	0.097053445	0.058381476	NA	0.077717461	2.5	0.749658931	NA	5	1	1	0.936172922	0.56314494	NA	1.333333333	3.333333333	4	1	2.5	2.5	4	4	3	3	3	5	1515	32.807	0.477653483	0.4	0.4	0.4	0.333333333	4	-1.5	0	1	0	0.625	0.749658931	0.833333333	0.5	0.625	0.625	0.833333333	0.833333333	0.178621786	NA
400	60	0.12221489	0.095805802	0.027807907	NA	0.061806854	2.5	0.505722784	NA	5	1	1	0.783912679	0.227532889	NA	1.666666667	4.333333333	4.333333333	1.5	2.5	2.5	4	4	4	4	5	5	1515	32.807	0.477653483	0.6	0.6	0.384615385	0.384615385	4.333333333	-1.833333333	0	0	0	0.576923077	0.505722784	0.5	0.5	0.625	0.625	0.625	0.625	-0.024162732	NA
[truncated: 3 more columns]
