# Supplementary material for: Widespread variation in heat tolerance and symbiont load are associated with growth tradeoffs in the coral Acropora hyacinthus in Palau
Source: eLife. 2021 Aug 13;10:e64790. doi: 10.7554/eLife.64790 (PMC8457836; doi:10.7554/eLife.64790)
Supplement: Supplementary file 1. [file elife-64790-supp1.xlsx]

## Sheet: Sheet1
Reef	Latitude	Longitude	Mean Control Proportion	Mean Heated Proportion	Control Proportion Std. Dev.	North	Region	Forereef	Mean Depth (m)	Maximum Temperature	Mean Time Points Above 31	Temperature Variance	Proportion Top Colonies	Mean Symbiont Retention	Area (m2)	Time Points Above 32	Time Points Above 33	Time Points Above 34	Time Points Above 35
7	7.29173	134.51	0.105	0.075	0.039	0	E	0	0.134	35.649	1845	0.432	0.444	0.735	335000	379.7	141.3	28	2
9	7.28929	134.503	0.089	0.043	0.044	0	E	0	0.24	35.222	1547	0.416	0.5	0.647	244400	347.5	144.3	48.5	3.5
13	7.26128	134.269	0.083	0.017	0.035	0	S	0	3.885	31.574	1425	0.349	0	0.214	5684	0	0	0	0
14	7.25296	134.263	0.094	0.032	0.037	0	S	0	3.092	32.291	2652.3	0.383	0	0.352	1983	2.3	0	0	0
15	7.24308	134.268	0.085	0.057	0.049	0	S	0	1.276	NA	NA	NA	0.5	0.783	95340	NA	NA	NA	NA
17	7.22614	134.341	0.099	0.052	0.033	0	S	0	NA	33.118	2451.7	0.324	0	0.542	286500	8.7	0.7	0	0
18	7.21172	134.34	0.072	0.042	0.039	0	S	0	1.558	32.086	1204	0.327	0.25	0.671	8721	1	0	0	0
19	7.20496	134.336	0.115	0.046	0.065	0	S	0	1.195	32.086	1412.7	0.296	0	0.404	11890	1.3	0	0	0
21	7.20507	134.397	0.087	0.045	0.034	0	E	0	0.492	NA	NA	NA	0	0.47	1280000	NA	NA	NA	NA
22	7.4275	134.384	0.112	0.08	0.021	0	W	0	3.022	36.511	2395	0.454	0	0.715	28000	11	9	4	0
23	7.43045	134.375	0.075	0.056	0.023	0	W	0	2.78	33.43	3101.8	0.42	0.4	0.696	32250	185	16	0	0
24	7.43595	134.377	0.112	0.072	0.059	0	W	0	2.009	32.807	3204.5	0.423	0.571	0.736	13510	165.5	0	0	0
25	7.43815	134.387	0.053	0.034	0.028	0	W	0	1.856	32.394	2938.7	0.378	0.167	0.625	46130	48.3	0	0	0
26	7.45573	134.402	0.081	0.064	0.031	0	W	0	0.725	36.187	3070.7	0.589	0.556	0.847	13060	68.7	8	5.3	2.7
27	7.4496	134.402	0.151	0.073	0.071	0	W	0	0.601	39.276	3044.5	0.579	0.2	0.48	24000	137.5	10.5	6	2.5
30	7.82055	134.573	0.102	0.028	0.052	1	E	0	NA	NA	NA	NA	0	0.307	72940	0	0	0	0
31	7.85548	134.531	0.059	0.023	0.027	1	N	0	NA	32.807	1127.5	0.337	0	0.387	65510	37.3	0	0	0
32	7.85281	134.531	0.096	0.034	0.056	1	N	0	1.12	32.497	871	0.335	0	0.439	12220	29	0	0	0
33	7.80896	134.564	0.102	0.064	0.038	1	N	0	NA	33.118	495.5	0.293	0.143	0.602	33400	17.3	2	0	0
34	7.80922	134.565	0.09	0.029	0.046	1	N	0	NA	NA	NA	NA	0.143	0.407	14420	7.7	0	0	0
35	7.81062	134.57	0.118	0.033	0.058	1	N	0	-0.015	35.009	1918	0.383	0.167	0.545	146000	203.5	48.5	9.5	0.5
36	7.86627	134.524	0.068	0.027	0.03	1	N	0	-0.174	34.479	1933.5	0.433	0	0.473	112000	253.5	70	11.5	0
37	7.79289	134.617	0.082	0.034	0.06	1	N	0	NA	NA	NA	NA	0.125	0.501	226200	0	0	0	0
38	7.79715	134.618	0.086	0.04	0.039	1	N	0	0.264	NA	NA	NA	0.125	0.439	159400	35	0	0	0
39	7.78593	134.623	0.075	0.038	0.036	1	N	0	0.431	NA	NA	NA	0.2	0.612	129500	NA	NA	NA	NA
40	7.88682	134.661	0.125	0.068	0.033	1	N	0	0.182	32.188	540	0.362	0	0.539	16340	4	0	0	0
41	7.90962	134.641	0.132	0.086	0.045	1	N	0	0.292	33.014	558	0.344	0.375	0.683	97620	25.5	0.5	0	0
42	7.91835	134.644	0.11	0.094	0.044	1	N	0	0.894	31.983	205	0.294	0.667	0.873	9232	0	0	0	0
43	7.91863	134.647	0.169	0.047	0.074	1	N	0	0.582	33.222	686.3	0.39	0	0.277	108400	52	3.5	0	0
44	7.92791	134.642	0.162	0.084	0.025	1	N	0	NA	32.188	486	0.326	0	0.52	31530	3	0	0	0
50	7.28993	134.241	0.103	0.038	0.058	0	F	1	3.108	32.291	907.5	0.333	0.125	0.379	NA	6	0	0	0
51	7.29864	134.238	0.121	0.042	0.072	0	F	1	3.473	32.6	1221	0.452	0.143	0.432	NA	24	0	0	0
52	7.30488	134.234	0.074	0.047	0.032	0	F	1	2.332	NA	NA	NA	0.2	0.595	NA	NA	NA	NA	NA
60	7.71672	134.568	0.077	0.043	0.049	1	F	1	0.915	32.807	1515	0.478	0.571	0.676	NA	81	0	0	0
61	7.72908	134.571	0.109	0.081	0.064	1	F	1	0.275	33.326	1526	0.419	0.5	0.746	NA	131	3.7	0	0
62	7.8691	134.509	0.076	0.064	0.059	1	F	1	0.116	33.326	1321.5	0.461	0.667	0.804	NA	98	5.5	0	0
65	7.92862	134.497	0.126	0.097	0.07	1	F	1	1.2	31.88	151.3	0.26	0.5	0.959	NA	0	0	0	0
