# Supplementary material for: Widespread variation in heat tolerance and symbiont load are associated with growth tradeoffs in the coral Acropora hyacinthus in Palau
Source: eLife. 2021 Aug 13;10:e64790. doi: 10.7554/eLife.64790 (PMC8457836; doi:10.7554/eLife.64790)
Supplement: Supplementary file 2. — Average percent time spent per reef above 31–35°C (out of 35,764 observations) in the five geographic regions in this study. Values per individual reef can be found in Supplementary file 1. [file elife-64790-supp2.xlsx]

## Sheet: Sheet1
	% TIME PERIODS SPENT ABOVE:
REGION	>31℃	>32℃	>33℃	>34℃	>34.5℃	>35℃
E	4.77	1.04	0.41	0.03	0.03	0.01
W	8.23	0.29	0.02	0	0	0
S	5.12	0.01	0	0	0	0
N	2.33	0.16	0.03	0	0	0
F	2.87	0.13	0.01	0	0	0
